# Supplementary material
Source: Elsevier journal article supplement (https://rcastoragev2.blob.core.windows.net/61229df8078b973f211860fc3a611106/mmc1.pdf)
Supplement: mmc1 [file mmc1.pdf]

# THE LANCET

## Healthy Longevity

### Supplementary appendix

This appendix formed part of the original submission and has been peer reviewed. We post it as supplied by the authors.

Supplement to: Hanlon P, Fauré I, Corcoran N, et al. Frailty measurement, prevalence, incidence, and clinical implications in people with diabetes: a systematic review and study-level meta-analysis. *Lancet Healthy Longev* 2020; published online Nov 19. [https://doi.org/10.1016/S2666-7568\(20\)30014-3](https://doi.org/10.1016/S2666-7568(20)30014-3).

# Supplementary material

## Contents

|                                                                                                                |    |
|----------------------------------------------------------------------------------------------------------------|----|
| Medline Search Strategy.....                                                                                   | 3  |
| Search Terms.....                                                                                              | 3  |
| Language restriction .....                                                                                     | 3  |
| Years searched .....                                                                                           | 3  |
| Countries of included studies .....                                                                            | 4  |
| The Newcastle-Ottawa Scale – Adaptation of criteria .....                                                      | 5  |
| 1 – Representativeness of the exposed (i.e. frail) cohort.....                                                 | 5  |
| 2 – Selection of the non-exposed (i.e. non-frail) cohort.....                                                  | 5  |
| 3 – Ascertainment of exposure .....                                                                            | 5  |
| 4 – Non-respondents .....                                                                                      | 5  |
| 5 – Demonstration that outcome of interest was not present at the start of the study .....                     | 5  |
| Comparability:.....                                                                                            | 6  |
| 1 – Comparability of the cohorts on the basis of the design or analysis being controlled for confounders ..... | 6  |
| Outcomes:.....                                                                                                 | 6  |
| 1 – Assessment of outcomes.....                                                                                | 6  |
| 2 – Follow-up long enough for outcomes to occur .....                                                          | 6  |
| 3 – Adequacy of follow-up of cohorts .....                                                                     | 6  |
| Quality assessment – Adapted Newcastle Ottawa Scale.....                                                       | 7  |
| Details of studies of frailty prevalence .....                                                                 | 12 |
| Outcomes of included studies.....                                                                              | 19 |
| Mortality .....                                                                                                | 19 |
| Hospitalisation and Emergency Department Attendance .....                                                      | 24 |
| HbA1c.....                                                                                                     | 26 |
| Diabetes complications.....                                                                                    | 29 |
| Disability.....                                                                                                | 34 |
| Cognitive impairment .....                                                                                     | 40 |
| Quality of Life .....                                                                                          | 40 |
| Depression .....                                                                                               | 42 |
| Assessment of publication bias .....                                                                           | 44 |
| References of included studies .....                                                                           | 46 |



## Medline Search Strategy

### Search Terms

1. Exp Frailty/
2. Exp Frail Elderly/
3. Frail\*.tw
4. 1 or 2 or 3
5. Exp Diabetes Mellitus
6. Diabet\*.tw
7. (IDDM or NIDDM or MODY or T1DM, or T2DM or T1D or T2D).tw
8. (non insulin\* depend\* or non insulin depend\* or non insulin?depend\* or non insulin ?depend).tw
9. (insulin\* depend\* or insulin ?depend\*).tw
10. 5 or 6 or 7 or 8 or 9
11. Exp Diabetes Insipidus/
12. Diabet\* insipidus.tw
13. 11 or 12
14. 10 not 13
15. 4 and 14

### Language restriction

None applied to search (non-English language studies excluded at screening stage)

### Years searched

2001-November 2019

Countries of included studies

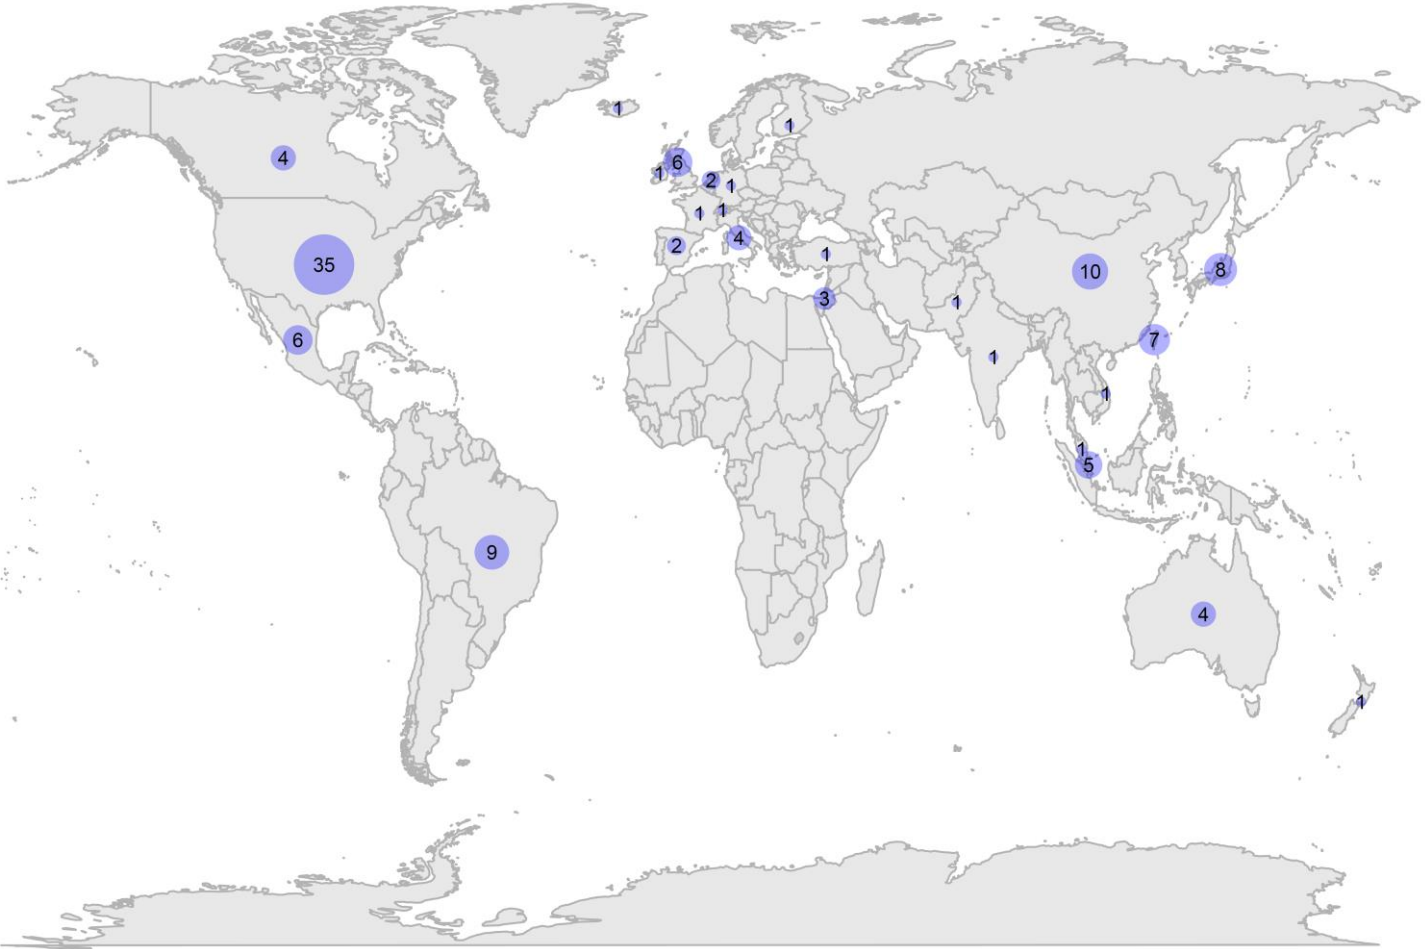

## The Newcastle-Ottawa Scale – Adaptation of criteria

Adaptation for studies assessing the prevalence and impact of frailty in diabetes

### 1 – Representativeness of the exposed (i.e. frail) cohort

- a) Truly representative (one star)
- b) Somewhat representative (one star)
- c) Selected group
- d) No description of the derivation of the cohort

### 2 – Selection of the non-exposed (i.e. non-frail) cohort

- a) Drawn from the same community as the exposed cohort (one star)
- b) Drawn from a different source
- c) No description of the derivation of the non-exposed cohort

### 3 – Ascertainment of exposure (adapted for measurement of frailty)

- a) Validated measurement tool for frailty (two stars)
- b) Non-validated measurement tool, but the tool is available or described (one star)
- c) No description of measurement tool

### 4 – Non-respondents

- a) Comparability between respondents and non-respondents' characteristics is established, and the response rate is satisfactory (one star)
- b) The response rate is unsatisfactory, or the comparability between respondents and non-respondents is unsatisfactory
- c) No description of the response rate of the characteristics of the responders and non-responders

### 5 – Demonstration that outcome of interest was not present at the start of the study

- a) Yes (one star)
- b) No

## Comparability:

1 – Comparability of the cohorts on the basis of the design or analysis being controlled for confounders

- a) The study controls for age and sex (one star)
- b) The study controls for other factors (one star)
- c) Cohorts are not comparable on the basis of the design or analysis controlled for confounders

## Outcomes:

1 – Assessment of outcomes

- a) Independent assessment (one star)
- b) Record linkage (one star)
- c) Self-report
- d) No description
- e) Other

2 – Follow-up long enough for outcomes to occur

- a) Yes (one star)
- b) No

3 – Adequacy of follow-up of cohorts

- a) Complete follow-up: all subjects accounted for (one star)
- b) Subjects lost to follow-up unlikely to introduce bias – number lost less than or equal to 20% or description of those lost suggested no different from those followed (one star)
- c) Follow-up rate less than 80% and no description of those lost
- d) No statement

## Quality assessment – Adapted Newcastle Ottawa Scale

| Author          | Year | Representative | Selection of non frail comparison | Ascertainment of exposure frailty | Non respondents | Outcome not present at start | Controls for age and sex | Control for other factors | Outcome assessment | Length of follow up | Adequacy of follow up | Cross-sectional score | Longitudinal score |
|-----------------|------|----------------|-----------------------------------|-----------------------------------|-----------------|------------------------------|--------------------------|---------------------------|--------------------|---------------------|-----------------------|-----------------------|--------------------|
| Adame Perez     | 2019 | 0              | 1                                 | 2                                 | 0               | -                            | -                        | -                         | -                  | -                   | -                     | 3/5                   | -                  |
| Aguilar-Navarro | 2019 | 0              | 1                                 | 1                                 | 0               | -                            | -                        | -                         | -                  | -                   | -                     | 2/5                   | -                  |
| Aguayo          | 2019 | 1              | 1                                 | 2                                 | 0               | -                            | -                        | -                         | -                  | -                   | -                     | 4/5                   | -                  |
| Al Snih         | 2009 | 1              | 1                                 | 1                                 | 0               | -                            | -                        | -                         | -                  | -                   | -                     | 3/5                   | -                  |
| Almeida         | 2016 | 1              | 1                                 | 2                                 | 0               | -                            | -                        | -                         | -                  | -                   | -                     | 4/5                   | -                  |
| Ambagtsheer     | 2019 | 0              | 1                                 | 1                                 | 0               | -                            | -                        | -                         | -                  | -                   | -                     | 2/5                   | -                  |
| Anjos           | 2017 | 0              | 1                                 | 1                                 | 0               | -                            | -                        | -                         | -                  | -                   | -                     | 2/5                   | -                  |
| Atif            | 2019 | 0              | 1                                 | 2                                 | 1               | -                            | -                        | -                         | -                  | -                   | -                     | 4/5                   | -                  |
| Avila_flunes    | 2008 | 1              | 1                                 | 1                                 | 0               | -                            | -                        | -                         | -                  | -                   | -                     | 3/5                   | -                  |
| Azmon           | 2018 | 0              | 1                                 | 2                                 | 0               | -                            | -                        | -                         | -                  | -                   | -                     | 3/5                   | -                  |
| Bello-Chavolla  | 2017 | 1              | 1                                 | 1                                 | 0               | -                            | -                        | -                         | -                  | -                   | -                     | 3/5                   | -                  |
| Boas            | 2018 | 0              | 1                                 | 2                                 | 0               | -                            | -                        | -                         | -                  | -                   | -                     | 3/5                   | -                  |
| Bouillon        | 2013 | 1              | 1                                 | 2                                 | 0               | -                            | -                        | -                         | -                  | -                   | -                     | 4/5                   | -                  |
| Brunner         | 2018 | 1              | 1                                 | 2                                 | 0               | 1                            | 1                        | 1                         | 1                  | 1                   | 1                     | 4/5                   | 10/11              |
| Cacciatore      | 2013 | 1              | 1                                 | 1                                 | 0               | 1                            | 1                        | 1                         | 1                  | 1                   | 1                     | 3/5                   | 9/11               |
| Cakmur          | 2015 | 1              | 1                                 | 1                                 | 0               | -                            | -                        | -                         | -                  | -                   | -                     | 3/5                   | -                  |
| Calado          | 2016 | 1              | 1                                 | 1                                 | 0               | -                            | -                        | -                         | -                  | -                   | -                     | 3/5                   | -                  |
| Carneiro        | 2016 | 1              | 1                                 | 2                                 | 0               | -                            | -                        | -                         | -                  | -                   | -                     | 4/5                   | -                  |
| Castrejon-Perez | 2018 | 1              | 1                                 | 2                                 | 0               | -                            | -                        | -                         | -                  | -                   | -                     | 4/5                   | -                  |



|                  |      |   |   |   |   |   |   |   |   |   |   |     |       |
|------------------|------|---|---|---|---|---|---|---|---|---|---|-----|-------|
| Castrejon-Perez  | 2012 | 1 | 1 | 1 | 0 | - | - | - | - | - | - | 3/5 | -     |
| Castrejon-Perez  | 2017 | 1 | 1 | 2 | 0 | - | - | - | - | - | - | 4/5 | -     |
| Castro-Rodriguez | 2016 | 1 | 1 | 2 | 0 | 1 | 1 | 1 | 1 | 1 | 1 | 4/5 | 10/11 |
| Cesari           | 2006 | 1 | 1 | 1 | 0 | - | - | - | - | - | - | 3/5 | -     |
| Chang            | 2010 | 1 | 1 | 1 | 0 | - | - | - | - | - | - | 3/5 | -     |
| Chang            | 2012 | 0 | 1 | 1 | 0 | - | - | - | - | - | - | 2/5 | -     |
| Chao             | 2018 | 1 | 1 | 1 | 0 | 1 | 1 | 1 | 1 | 1 | 1 | 3/5 | 9/11  |
| Chaves           | 2005 | 1 | 1 | 2 | 0 | - | - | - | - | - | - | 4/5 | -     |
| Chen             | 2010 | 1 | 1 | 2 | 0 | - | - | - | - | - | - | 4/5 | -     |
| Chen             | 2014 | 1 | 1 | 2 | 0 | - | - | - | - | - | - | 4/5 | -     |
| Cheong           | 2020 | 1 | 1 | 1 | 0 | 1 | 1 | 1 | 1 | 1 | 1 | 3/5 | 9/11  |
| Chhetri          | 2017 | 1 | 1 | 2 | 0 | 1 | 1 | 1 | 1 | 1 | 1 | 4/5 | 10/11 |
| Chiu             | 2019 | 1 | 1 | 1 | 1 | 1 | 1 | 1 | 1 | 1 | 1 | 4/5 | 10/11 |
| Chode            | 2016 | 1 | 1 | 2 | 0 | 1 | 1 | 1 | 1 | 1 | 0 | 4/5 | 9/11  |
| Cigolle          | 2009 | 1 | 1 | 2 | 1 | - | - | - | - | - | - | 5/5 | -     |
| Crow             | 2018 | 1 | 1 | 1 | 0 | - | - | - | - | - | - | 3/5 | -     |
| da Silva         | 2015 | 0 | 1 | 1 | 0 | - | - | - | - | - | - | 2/5 | -     |
| Danon-Hersch     | 2012 | 1 | 1 | 1 | 0 | - | - | - | - | - | - | 3/5 | -     |
| de Leon Gonzalez | 2016 | 1 | 1 | 2 | 0 | - | - | - | - | - | - | 4/5 | -     |
| Doi              | 2018 | 1 | 1 | 1 | 0 | 1 | 1 | 1 | 1 | 1 | 1 | 3/5 | 9/11  |
| Espinoza         | 2010 | 1 | 1 | 2 | 0 | 1 | 1 | 1 | 1 | 1 | 1 | 4/5 | 10/11 |
| Espinoza         | 2012 | 1 | 1 | 2 | 1 | 1 | 1 | 1 | 1 | 1 | 1 | 5/5 | 11/11 |
| Espinoza         | 2015 | 1 | 1 | 2 | 0 | - | - | - | - | - | - | 4/5 | -     |
| Ferri-Guerra     | 2019 | 1 | 1 | 2 | 0 | 1 | 1 | 1 | 1 | 1 | 1 | 4/5 | 10/11 |
| Fried            | 2001 | 1 | 1 | 2 | 0 | - | - | - | - | - | - | 4/5 | -     |
| Garcia-Esquinas  | 2015 | 1 | 1 | 1 | 0 | 1 | 1 | 1 | 1 | 1 | 1 | 3/5 | 9/11  |
| Hanlon           | 2018 | 0 | 1 | 1 | 0 | - | - | - | - | - | - | 2/5 | -     |

|               |       |   |   |   |   |   |   |   |   |   |   |     |       |
|---------------|-------|---|---|---|---|---|---|---|---|---|---|-----|-------|
| Hasan         | 2017  | 0 | 1 | 2 | 0 | - | - | - | - | - | - | 3/5 | -     |
| Hippisley-Cox | 2017  | 1 | 1 | 1 | 0 | - | - | - | - | - | - | 3/5 | -     |
| Howrey        | 2018  | 1 | 1 | 1 | 0 | - | - | - | - | - | - | 3/5 | -     |
| Hubbard       | 2010  | 0 | 1 | 2 | 0 | 1 | 0 | 0 | 1 | 1 | 1 | 3/5 | 7/11  |
| Hyde          | 2019  | 1 | 1 | 2 | 0 | - | - | - | - | - | - | 4/5 | -     |
| Khan          | 2013  | 1 | 1 | 1 | 0 | - | - | - | - | - | - | 3/5 | -     |
| Khanderwal    | 2012  | 0 | 1 | 1 | 0 | - | - | - | - | - | - | 2/5 | -     |
| Kirkwood      | 2019  | 1 | 1 | 1 | 0 | - | - | - | - | - | - | 3/5 | -     |
| Kitamura      | 2019  | 1 | 1 | 1 | 0 | 1 | 1 | 1 | 1 | 1 | 1 | 3/5 | 9/11  |
| Lahousse      | 2014  | 1 | 1 | 1 | 0 | - | - | - | - | - | - | 3/5 | -     |
| Lee           | 2017  | 1 | 1 | 2 | 0 | - | - | - | - | - | - | 4/5 | -     |
| Lee           | 2011  | 1 | 1 | 1 | 0 | - | - | - | - | - | - | 3/5 | -     |
| Lee           | 2014  | 1 | 1 | 1 | 0 | 1 | 1 | 1 | 1 | 1 | 1 | 3/5 | 9/11  |
| Lekan         | 2018  | 0 | 1 | 1 | 0 | 1 | 1 | 0 | 1 | 0 | 1 | 2/5 | 6/11  |
| Li            | 2018  | 1 | 1 | 1 | 0 | 0 | 1 | 1 | 0 | 0 | 1 | 3/5 | 6/11  |
| Li            | 2019  | 1 | 1 | 2 | 0 | - | - | - | - | - | - | 4/5 | -     |
| Li            | 2019b | 1 | 1 | 1 | 0 | - | - | - | - | - | - | 3/5 | -     |
| Li            | 2015  | 0 | 1 | 2 | 0 | 1 | 1 | 1 | 1 | 1 | 0 | 3/5 | 8/11  |
| Li            | 2016  | 0 | 1 | 2 | 0 | - | - | - | - | - | - | 3/5 | -     |
| Liccini       | 2016  | 0 | 1 | 2 | 0 | 1 | 1 | 1 | 1 | 1 | 0 | 3/5 | 8/11  |
| Lin           | 2015  | 1 | 1 | 1 | 0 | - | - | - | - | - | - | 3/5 | -     |
| MacKenzie     | 2019  | 0 | 1 | 2 | 0 | - | - | - | - | - | - | 3/5 | -     |
| Matsuzawa     | 2010  | 0 | 1 | 1 | 0 | - | - | - | - | - | - | 2/5 | -     |
| McAllister    | 2018  | 1 | 1 | 2 | 0 | 1 | 1 | 1 | 1 | 1 | 1 | 4/5 | 10/11 |
| McAllister    | 2016  | 1 | 1 | 1 | 0 | - | - | - | - | - | - | 3/5 | -     |
| McAllister    | 2017  | 1 | 1 | 1 | 0 | 1 | 1 | 1 | 1 | 1 | 1 | 3/5 | 9/11  |
| McClure       | 2019  | 1 | 1 | 1 | 0 | - | - | - | - | - | - | 3/5 | -     |
| Merchant      | 2017  | 1 | 1 | 2 | 0 | - | - | - | - | - | - | 4/5 | -     |
| Mohr          | 2007  | 1 | 1 | 1 | 0 | - | - | - | - | - | - | 3/5 | -     |

|               |       |   |   |   |   |   |   |   |   |   |   |     |       |
|---------------|-------|---|---|---|---|---|---|---|---|---|---|-----|-------|
| Molist-Brunet | 2019  | 0 | 1 | 1 | 0 | - | - | - | - | - | - | 2/5 | -     |
| Moreira       | 2017  | 1 | 1 | 2 | 0 | - | - | - | - | - | - | 4/5 | -     |
| Moreira       | 2016  | 1 | 1 | 1 | 0 | - | - | - | - | - | - | 3/5 | -     |
| Motokawa      | 2018  | 1 | 1 | 2 | 0 | - | - | - | - | - | - | 4/5 | -     |
| Nadrusz       | 2017  | 1 | 1 | 1 | 0 | - | - | - | - | - | - | 3/5 | -     |
| Nelson        | 2007  | 0 | 1 | 1 | 0 | - | - | - | - | - | - | 2/5 | -     |
| Ng            | 2014  | 1 | 1 | 1 | 0 | - | - | - | - | - | - | 3/5 | -     |
| Nguyen        | 2019  | 1 | 1 | 1 | 0 | - | - | - | - | - | - | 3/5 | -     |
| Nguyen        | 2019b | 0 | 1 | 1 | 0 | - | - | - | - | - | - | 2/5 | -     |
| Nishimura     | 2019  | 0 | 1 | 2 | 0 | - | - | - | - | - | - | 3/5 | -     |
| Orkaby        | 2019  | 1 | 1 | 2 | 0 | - | - | - | - | - | - | 4/5 | -     |
| Ottenbacher   | 2009  | 1 | 1 | 1 | 0 | - | - | - | - | - | - | 3/5 | -     |
| Pilotto       | 2014  | 0 | 1 | 1 | 0 | 1 | 1 | 1 | 1 | 1 | 0 | 2/5 | 7/11  |
| Pollack       | 2017  | 1 | 1 | 1 | 0 | 1 | 1 | 1 | 1 | 1 | 1 | 3/5 | 9/11  |
| Presley       | 2019  | 0 | 1 | 2 | 0 | 1 | 1 | 1 | 1 | 1 | 1 | 3/5 | 9/11  |
| Raji          | 2010  | 1 | 1 | 1 | 0 | 1 | 1 | 1 | 1 | 1 | 1 | 3/5 | 9/11  |
| Ricci         | 2014  | 1 | 1 | 1 | 0 | - | - | - | - | - | - | 3/5 | -     |
| Saum          | 2012  | 1 | 1 | 1 | 0 | - | - | - | - | - | - | 3/5 | -     |
| Simpson       | 2016  | 1 | 1 | 1 | 0 | 1 | 1 | 1 | 1 | 1 | 1 | 3/5 | 9/11  |
| Sirola        | 2011  | 1 | 1 | 1 | 0 | - | - | - | - | - | - | 3/5 | -     |
| Tamura        | 2018  | 0 | 1 | 1 | 0 | - | - | - | - | - | - | 2/5 | -     |
| Tang          | 2013  | 1 | 1 | 2 | 0 | - | - | - | - | - | - | 4/5 | -     |
| Tepper        | 2018  | 0 | 1 | 1 | 0 | - | - | - | - | - | - | 2/5 | -     |
| Thein         | 2018  | 1 | 1 | 2 | 0 | 1 | 1 | 1 | 1 | 1 | 1 | 4/5 | 10/11 |
| Tuttle        | 2018  | 0 | 1 | 1 | 0 | - | - | - | - | - | - | 2/5 | -     |
| Vaingankar    | 2017  | 1 | 1 | 1 | 0 | - | - | - | - | - | - | 3/5 | -     |
| van Hateren   | 2015  | 0 | 1 | 1 | 0 | - | - | - | - | - | - | 2/5 | -     |
| Vaz Fragozo   | 2009  | 1 | 1 | 1 | 0 | - | - | - | - | - | - | 3/5 | -     |
| Veronese      | 2017  | 1 | 1 | 1 | 0 | - | - | - | - | - | - | 3/5 | -     |

|           |      |   |   |   |   |   |   |   |   |   |   |     |      |
|-----------|------|---|---|---|---|---|---|---|---|---|---|-----|------|
| Veronese  | 2016 | 1 | 1 | 1 | 0 | - | - | - | - | - | - | 3/5 | -    |
| Wang      | 2014 | 1 | 1 | 1 | 0 | - | - | - | - | - | - | 3/5 | -    |
| Wang      | 2017 | 1 | 1 | 1 | 0 | 1 | 1 | 1 | 1 | 0 | 0 | 3/5 | 7/11 |
| Wata-be   | 2017 | 1 | 1 | 1 | 0 | - | - | - | - | - | - | 3/5 | -    |
| Weinstein | 2018 | 1 | 1 | 1 | 0 | - | - | - | - | - | - | 3/5 | -    |
| Wong      | 2018 | 1 | 1 | 2 | 0 | - | - | - | - | - | - | 4/5 | -    |
| Wong      | 2010 | 1 | 1 | 1 | 0 | - | - | - | - | - | - | 3/5 | -    |
| Woo       | 2019 | 1 | 1 | 1 | 0 | - | - | - | - | - | - | 3/5 | -    |
| Woods     | 2005 | 1 | 1 | 1 | 0 | 1 | 1 | 1 | 1 | 1 | 1 | 3/5 | 9/11 |
| Wu        | 2009 | 0 | 1 | 1 | 0 | - | - | - | - | - | - | 2/5 | -    |
| Wu        | 2018 | 1 | 1 | 1 | 0 | - | - | - | - | - | - | 3/5 | -    |
| Xue       | 2019 | 0 | 1 | 1 | 0 | - | - | - | - | - | - | 2/5 | -    |
| Ya-gita   | 2018 | 0 | 1 | 2 | 0 | - | - | - | - | - | - | 3/5 | -    |
| Zaslavsky | 2016 | 1 | 1 | 1 | 0 | - | - | - | - | - | - | 3/5 | -    |

## Details of studies of frailty prevalence

| Author, Year         | Country   | Cohort                                 | Setting          | Frailty measure | Lower age limit or specified range | Type of diabetes | Number of people with diabetes | Mean/median age* | Number (%) female |
|----------------------|-----------|----------------------------------------|------------------|-----------------|------------------------------------|------------------|--------------------------------|------------------|-------------------|
| Adame Perez 2019     | Canada    |                                        | outpatient       | Edmonton        | ≥65                                | unspecified      | 41                             | 70 (65-74)       | 15 (36.6%)        |
| Aguilar-Navarro 2019 | Mexico    | Recruited from memory clinic           | outpatient       | Fried           | ≥60                                | unspecified      | 44                             | 73 (6.6)         | NA                |
| Aguayo 2019          | UK        | English Longitudinal Study of Aging    | community        | FI              | ≥50                                | unspecified      | 635                            | 70 (65-77)       | 2995 (55.7%)      |
| Al Snih 2009         | USA       | H-EPESE study                          | community        | Fried           | ≥67                                | unspecified      | 431                            | 75 (6)           | NA                |
| Ambagtsheer 2019     | Australia | Database of 10 aged care facilities    | residential_care | eFI             | ≥75                                | unspecified      | 120                            | 88 (9)           | 394 (66.6%)       |
| Anjos 2017           | Brazil    | Community diabetes clinic              | outpatient       | Fried           | ≥65                                | Type 2           | 82                             | 71 (4.8)         | 82 (100%)         |
| Atif 2019            | Pakistan  | Two diabetes outpatient clinics        | outpatient       | CFS             | ≥60                                | Type 2           | 400                            | 64 (5.5)         | 215 (53.8%)       |
| Avila_flunes 2008    | France    | Three-City study                       | community        | Fried           | ≥65                                | unspecified      | 565                            | 74.1 (5.2)       | 3726 (61.3%)      |
| Azmon 2018           | Israel    | Specialist diabetes outpatient service | outpatient       | Fried           | ≥60                                | Type 2           | 153                            | 70.3             | NA                |
| Bello-Chavolla 2017  | Mexico    | Coyoacán Cohort Study                  | community        | Fried           | ≥70                                | Type 2           | 135                            | 77.7 (5.8)       | NA                |
| Boas 2018            | Brazil    |                                        | outpatient       | Edmonton        | ≥60                                | unspecified      | 100                            | NA               | 126 (84%)         |

|                      |        |                                                                                        |            |                        |       |             |        |             |                |
|----------------------|--------|----------------------------------------------------------------------------------------|------------|------------------------|-------|-------------|--------|-------------|----------------|
| Cacciatore 2013      | Italy  | Osservatorio Geriatrico Regione Campania                                               | community  | Frailty staging system | ≥65   | unspecified | 188    | 74.3 (6.4)  | 712 (55.3%)    |
| Cakmur 2015          | Turkey |                                                                                        | community  | Fried                  | ≥65   | unspecified | 22     | 72.7 (7.7)  | 90 (53.6%)     |
| Calado 2016          | Brazil | FIBRA study                                                                            | community  | Fried                  | ≥65   | unspecified | 67     | 73.9 (6.5)  | 249 (64.7%)    |
| Carneiro 2016        | Brazil |                                                                                        | community  | Edmonton               | ≥60   | unspecified | 114    | 74 (7.14)   | 327 (64%)      |
| Castrejon-Perez 2018 | Mexico | ENSANUT                                                                                | community  | FI                     | ≥60   | unspecified | 1236   | 70.3 (7.8)  | 2943 (54.7%)   |
| Castrejon-Perez 2012 | Mexico | Mexican Study of Nutritional and Psychosocial Markers of Frailty (the Coyoacan cohort) | community  | Fried                  | ≥70   | unspecified | 147    | 77.9 (6.3)  | NA             |
| Cesari 2006          | Italy  | In Chianti study                                                                       | community  | Fried                  | ≥65   | unspecified | 95     | 74.8 (6.8)  | NA             |
| Chang 2010           | USA    | WHAS I and II                                                                          | community  | Fried                  | 70-79 | unspecified | 73     | 74.15 (2.8) | NA             |
| Chang 2012           | Taiwan |                                                                                        | outpatient | Fried                  | ≥65   | unspecified | 35     | 74.6 (6.3)  | NA             |
| Chao 2018            | Taiwan | Longitudinal Cohort of Diabetes Patients database                                      | community  | FRAIL                  | ≥20   | Type 2      | 560795 | 56.4 (13.8) | 258526 (46.1%) |
| Chaves 2005          | USA    | WHAS I and II                                                                          | community  | Fried                  | 70-80 | unspecified | 90     | 74.3 (2.9)  | NA             |
| Chen 2010            | Taiwan | Survey of Health and Living Status of the Elderly in Taiwan                            | community  | Fried                  | ≥65   | unspecified | 398    | 73.3 (1.5)  | NA             |
| Chen 2014            | Taiwan | The Coming of the Aging Society:<br><br>An Integrative Study on Social                 | community  | Fried                  | ≥65   | unspecified | 84     | 73.4        | 239 (48.3%)    |

|                       |             |                                                  |                  |            |       |             |       |              |              |
|-----------------------|-------------|--------------------------------------------------|------------------|------------|-------|-------------|-------|--------------|--------------|
|                       |             | Planning in Taiwan in 2025                       |                  |            |       |             |       |              |              |
| Chhetri 2017          | China       | BLSA-II                                          | community        | FI         | ≥55   | unspecified | 2634  | 70.5 (7.8)   | NA           |
| Cigolle 2009          | USA         | HRS                                              | community        | Fried      | ≥65   | unspecified | 260   | 75           | NA           |
| Crow 2018             | USA         | National Health and Nutrition Examination Survey | community        | Fried      | ≥60   | unspecified | 1060  | 71.1 (0.19)  | NA           |
| da Silva 2015         | Brazil      |                                                  | outpatient       | Fried      | 60-79 | Type 2      | 30    | 68.7 (6.92)  | NA           |
| Danon-Hersch 2012     | Switzerland | Lc65+                                            | community        | Fried      | 65-70 | unspecified | 129   | 67 (65-70)   | 515 (40.1%)  |
| de Leon Gonzalez 2016 | Mexico      | Mexican Health and Aging Study                   | community        | FRAIL      | ≥60   | unspecified | 801   | 67           | NA           |
| Ferri-Guerra 2019     | USA         |                                                  | community        | FI         | ≥65   | unspecified | 763   | 72.87 (6.78) | 13 (1.7%)    |
| Fried 2001            | USA         | CHS                                              | community        | Fried      | ≥65   | unspecified | 840   | 73.6         | 3079 (57.9%) |
| Hanlon 2018           | UK          | UK Biobank                                       | community        | Fried      | 40-70 | unspecified | 24696 | 62           | NA           |
| Hasan 2017            | Malaysia    |                                                  | residential_care | Gronigen   | ≥65   | unspecified | 69    | 76.8 (7.8)   | 126 (62.4%)  |
| Hippisley-Cox 2017    | UK          | Qresearch database                               | community        | Qmortality | ≥65   | Type 2      | 73909 | 75.3 (8)     | 274931 (55%) |
| Hubbard 2010          | England     | CSHA                                             | community        | CFS        | ≥70   | unspecified | 310   | 83.3         | NA           |
| Khan 2013             | USA         | Health ABC study                                 | community        | HABC       | 70-79 | unspecified | 404   | 73.6 (2.9)   | 1472 (52.1%) |
| Khanderwal 2012       | India       |                                                  | inpatient        | Fried      | ≥60   | unspecified | 51    | 66.4 (6.3)   | NA           |
| Kitamura 2019         | Japan       |                                                  | community        | Fried      | ≥65   | unspecified | 176   | 71 (5.6)     | 730 (57.2%)  |
| Lahousse 2014         | Netherlands | Rotterdam Study                                  | community        | Fried      | ≥55   | unspecified | 211   | 74 (9)       | NA           |
| Lee 2017              | Japan       | National Center for Geriatrics and               | community        | Fried      | ≥65   | unspecified | 1218  | 73.6 (5.5)   | 5037 (52.4%) |

|                    |           |                                                    |            |                    |       |             |        |              |               |
|--------------------|-----------|----------------------------------------------------|------------|--------------------|-------|-------------|--------|--------------|---------------|
|                    |           | Gerontology – Study of Geriatric Syndromes.        |            |                    |       |             |        |              |               |
| Lekan 2018         | USA       |                                                    | inpatient  | Frailty risk score | ≥55   | unspecified | 136    | 70.1 (55-98) | 146 (52.5%)   |
| Li 2018            | Taiwan    | NHIS Taiwan                                        | community  | FRAIL              | ≥65   | unspecified | 719    | NA           | NA            |
| Li 2019b           | China     | RuLAS                                              | community  | Fried              | 70-84 | unspecified | 121    | 73.3 (3.9)   | 937 (53.3%)   |
| Li 2015            | China     |                                                    | inpatient  | FRAIL              | ≥60   | Type 2      | 146    | 80 (74-84)   | 32 (21.9%)    |
| Liccini 2016       | USA       |                                                    | outpatient | FRAIL              | ≥50   | unspecified | 198    | 64.9 (8.7)   | NA            |
| Lin 2015           | Taiwan    | Taichung Community Health Study for Elders         | community  | Fried              | ≥65   | unspecified | 177    | 74 (7)       | 497 (48%)     |
| MacKenzie 2019     | Canada    |                                                    | inpatient  | CFS                | ≥65   | unspecified | 141    | 81.4 (8.1)   | 228 (57%)     |
| Matsuzawa 2010     | Japan     |                                                    | inpatient  | CGA                | ≥65   | unspecified | 288    | 72.8 (7.7)   | 164 (56.9%)   |
| McAllister 2018    | UK        | United Kingdom Health Improvement Network Database | community  | eFI                | ≥20   | unspecified | 292170 | 61.7         | NA            |
| McAllister 2016    | USA       | Clinformatics Data Mart                            | community  | John Hopkins ACG   | ≥20   | unspecified | 191590 | 50.4 (9.9)   | 89151 (46.5%) |
| McAllister 2017    | USA       | Clinformatics Data Mart                            | community  | John Hopkins ACG   | ≥20   | unspecified | 99694  | 53.9 (9.7)   | NA            |
| McClure 2019       | Australia |                                                    | community  | SPPB               | ≥50   | Type 2      | 87     | 70.2 (8.2)   | 29 (33.3%)    |
| Merchant 2017      | Singapore | HOPE study                                         | community  | FRAIL              | ≥65   | unspecified | 250    | 71.2         | 601 (57.2%)   |
| Mohr 2007          | USA       | MMAS                                               | community  | Fried              | ≥50   | unspecified | 65     | 67.9 (6)     | 0 (0%)        |
| Molist-Brunet 2019 | Spain     |                                                    | inpatient  | FI                 | ≥85   | Type 2      | 210    | 86.1 (4.8)   | 116 (55.2%)   |



|                  |             |                                    |            |                  |     |             |       |            |               |
|------------------|-------------|------------------------------------|------------|------------------|-----|-------------|-------|------------|---------------|
| Moreira 2017     | Brazil      |                                    | community  | Fried            | ≥65 | unspecified | 855   | 74 (6)     | 2951 (66.3%)  |
| Moreira 2016     | Brazil      | FIBRA study                        | community  | Fried            | ≥65 | Type 2      | 99    | 72         | 99 (100%)     |
| Motokawa 2018    | Japan       |                                    | community  | Kihon            | ≥65 | unspecified | 68    | 73.3 (5.8) | 397 (59.7%)   |
| Nadruz 2017      | USA         | ARIC                               | community  | Fried            | ≥68 | unspecified | 1188  | 75.6 (5)   | 2355 (59%)    |
| Nelson 2007      | USA         |                                    | outpatient | VES-13           | ≥75 | unspecified | 111   | 78         | 56 (50.5%)    |
| Ng 2014          | Singapore   | Singapore Longitudinal Aging Study | community  | Fried            | ≥55 | unspecified | 349   | 66.7 (7.7) | 1084 (64.3%)  |
| Nguyen 2019      | Vietnam     |                                    | community  | Fried            | ≥60 | unspecified | 24    | 72.8 (8.2) | 358 (68.5%)   |
| Nguyen 2019b     | New Zealand |                                    | outpatient | Fried            | ≥60 | unspecified | 158   | 69.5 (6.8) | 98 (62%)      |
| Nishimura 2019   | Japan       |                                    | outpatient | Kihon            | ≥60 | Type 2      | 213   | 70.2 (5.5) | 105 (49.3%)   |
| Orkaby 2019      | USA         | Framingham Heart study             | community  | Fried            | ≥60 | unspecified | 350   | 69.7 (7)   | 1194 (55%)    |
| Ottenbacher 2009 | USA         | H-EPESE study                      | community  | Fried            | ≥65 | unspecified | 568   | 74.3 (6.4) | 1195 (58.3%)  |
| Pollack 2017     | USA         |                                    | community  | Fried            | ≥65 | unspecified | 529   | 73.4 (5.8) | 0 (0%)        |
| Ricci 2014       | Brazil      | FIBRA study                        | community  | Fried            | ≥65 | unspecified | 189   | 71.9 (5.9) | 489 (64.3%)   |
| Simpson 2016     | USA         |                                    | community  | John Hopkins ACG | ≥20 | Type 2      | 54505 | 60 (52-68) | 26380 (48.4%) |
| Sirola 2011      | Finland     | Helsinki Businessmen Study         | community  | Fried            | ≥65 | unspecified | 89    | 73 (73)    | NA            |
| Tamura 2018      | Japan       |                                    | outpatient | Fried            |     | unspecified | 185   | 78 (75-82) | 201 (62.2%)   |
| Tang 2013        | China       | BLSA-II                            | community  | FI               | ≥55 | unspecified | 456   | 70.1 (9)   | NA            |
| Tepper 2018      | Israel      |                                    | outpatient | Fried            | ≥60 | Type 2      | 117   | 70.6 (6.5) | 46 (39.3%)    |

|                  |               |                                                             |            |                    |       |             |       |            |              |
|------------------|---------------|-------------------------------------------------------------|------------|--------------------|-------|-------------|-------|------------|--------------|
| Thein 2018       | Singapore     | Singapore Longitudinal Ageing Study                         | community  | Fried              | ≥55   | Type 2      | 486   | 66 (7.6)   | 1693 (62.8%) |
| Tuttle 2018      | USA           |                                                             | outpatient | mPPT               | NA    | Type 2      | 95    | 57 (12)    | 34 (35.8%)   |
| Vaingankar 2017  | Singapore     | Well-being of the Singapore Elderly study                   | community  | Fried              | ≥60   | unspecified | 622   | 69         | 1134 (53.9%) |
| van Hateren 2015 | Netherlands   | ZODIAC                                                      | outpatient | RAND-36            | ≥75   | Type 2      | 858   | 72.3 (7.2) | 519 (60.5%)  |
| Vaz Fragozo 2009 | USA           |                                                             | community  | Fried              | ≥78   | unspecified | 75    | 84.3 (4.5) | 252 (67.4%)  |
| Veronese 2017    | Iceland       | Age, Gene/Environment Susceptibility (AGES)—Reykjavik Study | community  | Fried              | ≥65   | unspecified | 427   | 76.2 (5.6) | 2444 (64%)   |
| Wang 2017        | USA           | Veterans Administration Electronic Medical Records          | community  | Frailty risk class | ≥65   | Type 2      | 41204 | 74.6 (5.8) | 0 (0%)       |
| Watanabe 2017    | Japan         | Obu Study of Health Promotion for the Elderly               | community  | Fried              | ≥60   | unspecified | 623   | 72.1 (5.6) | 2446 (51.8%) |
| Weinstein 2018   | Israel        |                                                             | community  | Fried              | 45-74 | unspecified | 118   | 77.2 (6.4) | 0 (0%)       |
| Wong 2010        | Canada        | Montreal Unmet Needs Study                                  | community  | Fried              | ≥75   | unspecified | 125   | 79.6 (4)   | 502 (67.8%)  |
| Woo 2019         | China         |                                                             | community  | FRAIL              |       | unspecified | 86    | 74.7 (7.7) | NA           |
| Wu 2009          | United States |                                                             | inpatient  | Fried              | ≥60   | unspecified | 14    | 77 (6)     | NA           |

|               |       |                                                  |            |       |     |             |     |            |              |
|---------------|-------|--------------------------------------------------|------------|-------|-----|-------------|-----|------------|--------------|
| Wu 2018       | China | Chinese Health and Retirement Longitudinal Study | community  | Fried | ≥65 | unspecified | 382 | 67         | 2618 (49.4%) |
| Xue 2019      | China |                                                  | inpatient  | Fried | ≥60 | unspecified | 36  | 78.5 (9)   | NA           |
| Yanagita 2018 | Japan |                                                  | outpatient | CFS   | ≥65 | Type 2      | 132 | 78.3 (7.9) | NA           |

## Outcomes of included studies

### Mortality

| Author     | Year | Country | Setting   | Frailty measure        | Number with diabetes | Mean or median age (sd or IQR) | Analysis                                                          | Adjustment                                                                                                                                | Effect size         |
|------------|------|---------|-----------|------------------------|----------------------|--------------------------------|-------------------------------------------------------------------|-------------------------------------------------------------------------------------------------------------------------------------------|---------------------|
| Cacciatore | 2013 | Italy   | community | Frailty staging system | 188                  | 72.8 (5.8)                     | Cox model per tertile increase in frailty staging system (female) | age, BMI, waist circumference, heart rate, pulse blood pressure, Charlson comorbidity index, drugs number, GDS, insulin, hypoglycemic     | HR 1.31 (1.03-1.85) |
| Cacciatore | 2013 | Italy   | community | Frailty staging system | 188                  | 72.8 (5.8)                     | Cox model per unit increase in frailty staging system (males)     | age, BMI, waist circumference, heart rate, pulse blood pressure, Charlson comorbidity index, drugs, hypertension, CAD, CHF, PAD, and CKD. | HR 1.99 (1.75-3.05) |

|                  |      |        |           |                     |        |              |                                                               |                                                                                                                                                                                 |                     |
|------------------|------|--------|-----------|---------------------|--------|--------------|---------------------------------------------------------------|---------------------------------------------------------------------------------------------------------------------------------------------------------------------------------|---------------------|
|                  |      |        |           |                     |        |              |                                                               | drugs number, GDS, insulin, hypoglycemic                                                                                                                                        |                     |
|                  |      |        |           |                     |        |              |                                                               | drugs, hypertension, CAD, CHF, PAD, and CKD.                                                                                                                                    |                     |
| Castro-Rodriguez | 2016 | Spain  | community | FI                  | 363    | 76 (71.2-79) | Cox model per 0.1 increase in FI                              | age, sex, Charlson index, disability                                                                                                                                            | HR 1.83 (1.49-2.26) |
| Castro-Rodriguez | 2016 | Spain  | community | Frailty trait scale | 363    | 76 (71.2-79) | Cox model per 10% increase in scale                           | age, sex, Charlson index, disability                                                                                                                                            | HR 1.51 (1.29-1.78) |
| Chao             | 2018 | Taiwan | community | FRAIL               | 560795 | 56.4 (13.8)  | Cox model (categorical on 0, 1, 2, 3+ FRAIL scale indicators) | Adjusted for demographic profiles, comorbidities (including obesity, mental illnesses, hypoglycemia history), substance use (smoking and alcohol abuse), aDCSI, and medications | HR 1.25 (1.15-1.36) |
| Chode            | 2016 | USA    | community | FRAIL               | 222    | 57.43 (4.4)  | Logistic regression 9 years follow-up                         | NA                                                                                                                                                                              | 1.45 (1.12-1.86)    |

|              |      |         |           |       |     |              |                                                       |                                                                                                                                                                                                                                       |                     |
|--------------|------|---------|-----------|-------|-----|--------------|-------------------------------------------------------|---------------------------------------------------------------------------------------------------------------------------------------------------------------------------------------------------------------------------------------|---------------------|
| Ferri-Guerra | 2019 | USA     | community | FI    | 763 | 72.87 (6.78) | Cox model, frail (FI>0.21) versus non-frail (FI<0.21) | adjusted for age, race, ethnicity, BMI and Median Household Income, Charlson Comorbidity Index, diabetes complications, duration of diabetes, use of insulin or sulfonylureas, metformin and level of glycemia control.               | HR 2.65 (1.52-4.64) |
| Hubbard      | 2010 | England | community | CFS   | 310 | 81.3         | Cox regression                                        | Age, sex, place of residence                                                                                                                                                                                                          | 1.42 (1.2-1.69)     |
| Kitamura     | 2019 | Japan   | community | Fried | 176 | NA           | Cox model (categorical)                               | age, sex, hypertension, high total cholesterol, low total cholesterol, low estimated glomerular filtration rate, overweight, low body mass index, anemia,<br><br>hypoalbuminemia, low Mini-Mental State Examination score, history of | 6.6 (2-22)          |

|         |      |           |            |                     |       |            |                                                             |                                                                                                                                                                                                                                        |                                      |
|---------|------|-----------|------------|---------------------|-------|------------|-------------------------------------------------------------|----------------------------------------------------------------------------------------------------------------------------------------------------------------------------------------------------------------------------------------|--------------------------------------|
|         |      |           |            |                     |       |            |                                                             | stroke and current smoking                                                                                                                                                                                                             |                                      |
| Li      | 2015 | NA        | NA         | FRAIL               | NA    | NA         | Log rank test                                               | none                                                                                                                                                                                                                                   | Significant association with frailty |
| Liccini | 2016 | USA       | outpatient | FRAIL               | 198   | 64.9 (8.7) | Raw numbers of deaths only                                  | NA                                                                                                                                                                                                                                     | NA                                   |
| Presley | 2019 | USA       | inpatient  | FI                  | 500   | 65 (58-75) | Cox model (continuous, with example of 0.05 point increase) | demographics, administrative, clinical EHR data                                                                                                                                                                                        | 1.45 (1.32-1.6)                      |
| Thein   | 2018 | Singapore | community  | Fried               | 486   | 67.3 (7.5) | Cox (frail versus not frail)                                | age, gender, education level, smoking, alcohol intake, and physical exercise, diabetes duration, WC, total cholesterol, HDL cholesterol, hypertension, cardiac disease, stroke, arthritis, hip fracture, polypharmacy, and depression. | 4.37 (2.38-8.03)                     |
| Wang    | 2017 | USA       | community  | indicator diagnoses | 41204 | 74.6 (5.8) | Cox regression                                              | age, race/ethnicity, Charlson                                                                                                                                                                                                          | 0.98 (0.89-1.07)                     |

|  |  |  |  |  |  |  |  |                                                 |  |
|--|--|--|--|--|--|--|--|-------------------------------------------------|--|
|  |  |  |  |  |  |  |  | comorbidity score,<br>BMI, HbA1c, statin<br>use |  |
|--|--|--|--|--|--|--|--|-------------------------------------------------|--|



## Hospitalisation and Emergency Department Attendance

| Author       | Year | Country | Setting   | Frailty measure | Number with diabetes | Mean or median age (SD or IQR) | Outcome         | Analysis                                                                           | Covariate adjustment                                                                                                                                                                                                    | Effect of frailty    |
|--------------|------|---------|-----------|-----------------|----------------------|--------------------------------|-----------------|------------------------------------------------------------------------------------|-------------------------------------------------------------------------------------------------------------------------------------------------------------------------------------------------------------------------|----------------------|
| Ferri-Guerra | 2019 | USA     | community | FI              | 763                  | 72.87 (6.78)                   | hospitalisation | CoxPH - prospective                                                                | adjusted for age, race, ethnicity, BMI and Median Household Income, Charlson Comorbidity Index, diabetes complications, duration of diabetes, use of insulin or sulfonylureas, metformin and level of glycemia control. | HR 2.36 (1.77-3.14)  |
| Li           | 2018 | Taiwan  | community | FRAIL           | 719                  | NA                             | hospitalisation | Retrospective (event in past year)                                                 | Adjusted for age, sex, education, marital status, duration of diabetes, use of insulin, falls, ADI disability, and IADI disability                                                                                      | OR 5.31 (1.87-15.1)  |
| Li           | 2015 | China   | inpatient | FRAIL           | 146                  | 80 (74-84)                     | hospitalisation | prospective - logistic regression (3 or more hospitalisations in 1 year follow-up) | Adjusted for age, gender, MMSE points, BMI, duration of diabetes, HbA1c, macroangiopathy, and nephropathy                                                                                                               | OR 5.99 (1.38-25.91) |

|         |      |        |            |       |        |             |                 |                                                                          |                                                                                                                                                                                 |                     |
|---------|------|--------|------------|-------|--------|-------------|-----------------|--------------------------------------------------------------------------|---------------------------------------------------------------------------------------------------------------------------------------------------------------------------------|---------------------|
| Liccini | 2016 | USA    | outpatient | FRAIL | 198    | 64.9 (8.7)  | hospitalisation | prospective - logistic regression (hospitalisation at 6 month follow-up) | adjusted for age, sex, education and HbA1c                                                                                                                                      | OR 4.7 (1.67-13.19) |
| Chao    | 2018 | Taiwan | community  | FRAIL | 560795 | 56.4 (13.8) | hospitalisation | CoxPH - prospective                                                      | Adjusted for demographic profiles, comorbidities (including obesity, mental illnesses, hypoglycemia history), substance use (smoking and alcohol abuse), aDCSI, and medications | HR 1.25 (1.17-1.33) |
| Li      | 2018 | Taiwan | community  | FRAIL | 719    | NA          | ED visit        | Retrospective (event in past year)                                       | Adjusted for age, sex, education, marital status, duration of diabetes, use of insulin, falls, ADI disability, and IADI disability                                              | 4.05 (1.31-12.49)   |

HbA1c

| Author       | Year | Country     | Setting    | Frailty measure | Number with diabetes | Mean or median age (SD or IQR) | Outcome                                                             | Analysis                     | Result                                                    |
|--------------|------|-------------|------------|-----------------|----------------------|--------------------------------|---------------------------------------------------------------------|------------------------------|-----------------------------------------------------------|
| Atif         | 2019 | Pakistan    | outpatient | CFS             | 400                  | NA                             | HbA1c above target level (7%) or below)                             | adjusted logistic regression | No significant difference with frailty (1.11 (0.44, 2.84) |
| Ferri-Guerra | 2019 | USA         | community  | FI              | 763                  | 72.87 (6.78)                   | HbA1c categorised as tight (<7%) intermediate (7-9%) and poor (>9%) | Chi squared                  | No significant difference with frailty                    |
| van Hateren  | 2015 | Netherlands | outpatient | RAND-36         | 858                  | 72.3 (7.2)                     | mean HbA1c                                                          | mean difference              | No significant difference between frail and non-frail     |
| Kitamura     | 2019 | Japan       | community  | Fried           | 176                  | NA                             | mean HbA1c                                                          | mean difference              | No significant difference between frail and non-frail     |
| Li           | 2015 | China       | inpatient  | Fried           | 146                  | 80 (74-84)                     | mean HbA1c                                                          | mean difference              | No significant                                            |

|           |      |        |           |                  |     |            |                                              |                          |                                                                  |
|-----------|------|--------|-----------|------------------|-----|------------|----------------------------------------------|--------------------------|------------------------------------------------------------------|
|           |      |        |           |                  |     |            |                                              |                          | difference between frail and non-frail                           |
| Mackenzie | 2019 | Canada | inpatient | CFS              | 141 | 80.6 (7.8) | mean HbA1c                                   | mean difference          | No significant difference between frail and non-frail            |
| Matsuzawa | 2010 | Japan  | inpatient | CGA              | 288 | 72.8 (7.7) | mean HbA1c                                   | mean difference (t-test) | Higher HbA1c in frail group (7.9±1.1 vs 7.4±1.4)                 |
| McAlister | 2016 | NA     | NA        | John Hopkins ACG | NA  | NA         | HbA1c categorised as <7%, 7-8%, 8-9% and >9% | descriptive              | no difference between health status groups                       |
| McAlister | 2017 | NA     | NA        | John Hopkins ACG | NA  | NA         | HbA1c categorised as <7%, 7-8%, 8-9% and >9% | Chi squared              | Slightly higher proportion of frail in <7% group and in >9 group |
| McAlister | 2018 | NA     | NA        | eFI              | NA  | NA         | HbA1c categorised as <6%, 6-6.5%, 6.5-       | Chi squared              | higher proportion of frail in <6% group, lower                   |

|               |      |       |            |        |     |            | 7%, 7-7.5%<br>and >7.5% |                                                                                                          | proportion<br>of frail in<br>>7.5 group                                                |
|---------------|------|-------|------------|--------|-----|------------|-------------------------|----------------------------------------------------------------------------------------------------------|----------------------------------------------------------------------------------------|
| Molist-Brunet | 2019 | Spain | inpatient  | FI     | 210 | 86.1 (4.8) | mean HbA1c              | mean difference (not statistically tested by no clinically meaningful difference between frailty groups) | not statistically tested by no clinically meaningful difference between frailty groups |
| Nelson        | 2007 | USA   | outpatient | VES-13 | 111 | 78         | mean HbA1c              | mean difference                                                                                          | no significant difference                                                              |
| Nelson        | 2007 | USA   | outpatient | VES-13 | 111 | 78         | HbA1c <7%               | Chi squared                                                                                              | no significant difference                                                              |
| Yanagita      | 2018 | Japan | outpatient | CFS    | 132 | 78.3 (7.9) | mean HbA1c              | mean difference                                                                                          | lower with frailty - lowest HbA1c at most severe end of frailty spectrum               |

## Diabetes complications

| Author  | Year | Country | Setting    | Frailty_measure  | N_diabetes | age        | Outcome                        | Description                                                                                  |                      |
|---------|------|---------|------------|------------------|------------|------------|--------------------------------|----------------------------------------------------------------------------------------------|----------------------|
| Pilotto | 2014 | Italy   | Outpatient | CGA              | 1324       | 73.3 (5.6) | cerebrovascular disease        | Chi squared test for cross sectional association between frailty and cerebrovascular disease | Positive association |
| Pilotto | 2014 | Italy   | Outpatient | CGA              | 1324       | 73.3 (5.6) | coronary artery disease        | Chi squared test for cross sectional association between frailty and coronary artery disease | Positive association |
| Pilotto | 2014 | Italy   | Outpatient | CGA              | 1324       | 73.3 (5.6) | any event in last 3 months     | Logistic regression (OR 1.83 (1.17, 2.86))                                                   | Positive association |
| Pilotto | 2014 | Italy   | Outpatient | CGA              | 1324       | 73.3 (5.6) | Hypoglycaemic hospitalisation  | Logistic regression (OR 7.67 (3.32, 17.7))                                                   | Positive association |
| Simpson | 2016 | USA     | community  | John Hopkins ACG | 54505      | 60 (52-68) | New macrovascular complication | Multivariate Cox Regression Analysis of New Diabetes                                         | no association       |

|             |      |             |            |         |        |             |                                                                                          |                                                                                                                                      |                      |
|-------------|------|-------------|------------|---------|--------|-------------|------------------------------------------------------------------------------------------|--------------------------------------------------------------------------------------------------------------------------------------|----------------------|
|             |      |             |            |         |        |             |                                                                                          | Complication in 54 505 Patients Initiating Oral Antidiabetic Drugs. HR 0.99 (0.86-1.13)                                              |                      |
| van Hateren | 2015 | Netherlands | outpatient | RAND-36 | 858    | 72.3 (7.2)  | Macrovascular complications                                                              | Chi squared test for cross sectional association between frailty and macrovascular disease                                           | Positive association |
| Chao        | 2018 | Taiwan      | community  | FRAIL   | 560795 | 56.4 (13.8) | cardiovascular event                                                                     | Cox PH model: HR 1.13 (1.02-1.25)                                                                                                    | Positive association |
| Li          | 2015 | China       | inpatient  | FRAIL   | 146    | 80 (74-84)  | macroangiopathy                                                                          | Logistic regression (OR 0.87 (0.24-3.13))                                                                                            | no association       |
| Hubbard     | 2010 | England     | community  | CFS     | 310    | 81.3        | Complications (retinopathy, recurrent infections, nephropathy and peripheral neuropathy) | Among older adults with diabetes, those who were frail were 2.62 times more likely to have a complication of diabetes than those who | Positive association |

|              |      |        |           |                  |        |              |                                                                                                                                          |                                                                                                                                              |                      |
|--------------|------|--------|-----------|------------------|--------|--------------|------------------------------------------------------------------------------------------------------------------------------------------|----------------------------------------------------------------------------------------------------------------------------------------------|----------------------|
|              |      |        |           |                  |        |              |                                                                                                                                          | were not frail (95% CI 1.36–5.06 times). This was independent of age, sex and number of years living with diabetes.                          |                      |
| Simpson      | 2016 | USA    | community | John Hopkins ACG | 54505  | 50 (62-58)   | New microvascular complication                                                                                                           | Multivariate Cox Regression Analysis of New Diabetes Complication in 54 505 Patients Initiating Oral Antidiabetic Drugs. HR 0.89 (0.70-1.13) | no association       |
| Ferri-Guerra | 2019 | USA    | community | FI               | 763    | 72.87 (6.78) | Diabetes with End organ damage: patients diagnosed with one or more of the following diagnosis: retinopathy, neuropathy and nephropathy. | Chi squared test for cross sectional association between frailty and microvascular disease                                                   | Positive association |
| Chao         | 2018 | Taiwan | community | FRAIL            | 560795 | 56.4 (13.8)  | aDCSI scores                                                                                                                             | Chi squared test for cross sectional                                                                                                         | Positive association |



|             |      |        |            |          |        |            |                       |                                                                                  |                      |
|-------------|------|--------|------------|----------|--------|------------|-----------------------|----------------------------------------------------------------------------------|----------------------|
|             |      |        |            |          |        |            |                       | association between frailty and aDCSI scores                                     |                      |
| McAllister  | 2018 | UK     | community  | eFI      | 292170 | 61.7       | nephropathy           | Chi squared test for cross sectional association between frailty and nephropathy | Positive association |
| Pilotto     | 2014 | Italy  | Outpatient | CGA      | 1324   | 73.3 (5.6) | nephropathy           | Chi squared test for cross sectional association between frailty and nephropathy | Positive association |
| Adame Perez | 2019 | Canada | outpatient | Edmonton | 41     | 70 (65-74) | nephropathy           | Chi squared test for cross sectional association between frailty and nephropathy | Positive association |
| Li          | 2015 | China  | inpatient  | FRAIL    | 146    | 80 (74-84) | nephropathy           | Logistic regression (OR 4.46 (1.24-15.97))                                       | Positive association |
| Tuttle      | 2018 | USA    | outpatient | mPPT     | 95     | 57 (12)    | Peripheral neuropathy | Chi squared test for cross sectional association                                 | Positive association |

|            |      |       |            |        |        |            |             |                                                                                  |                      |
|------------|------|-------|------------|--------|--------|------------|-------------|----------------------------------------------------------------------------------|----------------------|
|            |      |       |            |        |        |            |             | between frailty and peripheral neuropathy                                        |                      |
| McAllister | 2018 | UK    | community  | eFI    | 292170 | 61.7       | neuropathy  | Chi squared test for cross sectional association between frailty and neuropathy  | Positive association |
| Nelson     | 2007 | USA   | outpatient | VES-13 | 111    | 78         | neuropathy  | Chi squared test for cross sectional association between frailty and neuropathy  | Positive association |
| Pilotto    | 2014 | Italy | Outpatient | CGA    | 1324   | 73.3 (5.6) | neuropathy  | Chi squared test for cross sectional association between frailty and neuropathy  | Positive association |
| McAllister | 2018 | UK    | community  | eFI    | 292170 | 61.7       | retinopathy | Chi squared test for cross sectional association between frailty and retinopathy | Positive association |

|         |      |        |            |          |      |            |                   |                                                                                                    |                      |
|---------|------|--------|------------|----------|------|------------|-------------------|----------------------------------------------------------------------------------------------------|----------------------|
| Nelson  | 2007 | USA    | outpatient | VES-13   | 111  | 78         | visual impairment | Chi squared test for cross sectional association between frailty and retinopathy                   | Positive association |
| Pilotto | 2014 | Italy  | Outpatient | CGA      | 1324 | 73.3 (5.6) | retinopathy       | Chi squared test for cross sectional association between frailty and retinopathy                   | Positive association |
| Boas    | 2018 | Brazil | outpatient | Edmonton | 100  | NA         | foot ulcer        | Increasing frailty severity associated with higher proportion of participants with foot ulceration | Positive association |

### Disability

| Author | Year | Country | Setting | Frailty measure | Number with diabetes | Mean or median age (SD or IQR) | Disability measure | Covariate adjustment | Analysis | Outcome |
|--------|------|---------|---------|-----------------|----------------------|--------------------------------|--------------------|----------------------|----------|---------|
|--------|------|---------|---------|-----------------|----------------------|--------------------------------|--------------------|----------------------|----------|---------|

|    |      |       |           |       |     |            |                                                                                                                                                                                                                                                                                                                                                                                                                                                                                                                                                                                                                                                                  |                                                                                   |                     |                                                            |
|----|------|-------|-----------|-------|-----|------------|------------------------------------------------------------------------------------------------------------------------------------------------------------------------------------------------------------------------------------------------------------------------------------------------------------------------------------------------------------------------------------------------------------------------------------------------------------------------------------------------------------------------------------------------------------------------------------------------------------------------------------------------------------------|-----------------------------------------------------------------------------------|---------------------|------------------------------------------------------------|
| Li | 2015 | China | inpatient | FRAIL | 146 | 80 (74-84) | Physical performance was assessed by activities of daily living (ADLs) and instrumental activities of daily living (IADLs). ADLs included 6 items: feeding, bowels and bladder control, toileting, transfers, dressing and bathing. IADLs included 8 items: using the telephone, food preparation, shopping, managing money, house-keeping, laundry, getting to places outside of walking distance, and taking medicine. Each of the items was categorized as severely dependent, assistant living, and completely independent. ADL disability and IADL disability were defined as requiring any assistance in performing at least 1 of the items, respectively. | models adjusted for age, gender, MMSE points, BMI, duration of diabetes and HbA1c | logistic regression | cross sectional association (OR 6.58 (1.66-26.10) for ADL) |
|----|------|-------|-----------|-------|-----|------------|------------------------------------------------------------------------------------------------------------------------------------------------------------------------------------------------------------------------------------------------------------------------------------------------------------------------------------------------------------------------------------------------------------------------------------------------------------------------------------------------------------------------------------------------------------------------------------------------------------------------------------------------------------------|-----------------------------------------------------------------------------------|---------------------|------------------------------------------------------------|

|       |      |     |           |       |     |             |                                                                                                                                                                                                                                                                                                                                                                               |          |                                                    |                                                      |
|-------|------|-----|-----------|-------|-----|-------------|-------------------------------------------------------------------------------------------------------------------------------------------------------------------------------------------------------------------------------------------------------------------------------------------------------------------------------------------------------------------------------|----------|----------------------------------------------------|------------------------------------------------------|
| Chode | 2016 | USA | community | FRAIL | 222 | 57.43 (4.4) | ADLs included seven items (bathing, dressing, eating, transferring bed or chair, walking across a room, getting outside, and using toilet) (21). IADLs included eight items (preparing meals, shopping for groceries, managing money, making phone calls, doing light housework, doing heavy housework, getting to places outside walking distance, and managing medications) | age, sex | linear regression (number of ADL/IADL impairments) | cross sectional associations (number of impairments) |
|-------|------|-----|-----------|-------|-----|-------------|-------------------------------------------------------------------------------------------------------------------------------------------------------------------------------------------------------------------------------------------------------------------------------------------------------------------------------------------------------------------------------|----------|----------------------------------------------------|------------------------------------------------------|

|                  |      |       |           |    |     |              |                                                                                                                                                                                                                                                                                                                                                                                                                                                                   |      |                                                                         |                                                              |
|------------------|------|-------|-----------|----|-----|--------------|-------------------------------------------------------------------------------------------------------------------------------------------------------------------------------------------------------------------------------------------------------------------------------------------------------------------------------------------------------------------------------------------------------------------------------------------------------------------|------|-------------------------------------------------------------------------|--------------------------------------------------------------|
| Castro-Rodriguez | 2016 | Spain | community | FI | 363 | 76 (71.2-79) | <p>Functional disability was evaluated according to the Katz Index (which ranks dependency 6six functions of daily living: bathing, dressing, toileting, transferences, continence, and feeding) obtained from each individual in the baseline and follow-up visits.<sup>24</sup> Incident disability was ascertained by comparison of the Katz Index. People were classified as having incident disability when any worsening in the Katz Index was detected</p> | none | Baseline FI compared between those with and without incident disability | Positive association between frailty and incident disability |
|------------------|------|-------|-----------|----|-----|--------------|-------------------------------------------------------------------------------------------------------------------------------------------------------------------------------------------------------------------------------------------------------------------------------------------------------------------------------------------------------------------------------------------------------------------------------------------------------------------|------|-------------------------------------------------------------------------|--------------------------------------------------------------|

|         |      |     |            |       |     |               |                                                                                                                                                                                                                                                                                                                                                                               |                               |                     |                                                   |
|---------|------|-----|------------|-------|-----|---------------|-------------------------------------------------------------------------------------------------------------------------------------------------------------------------------------------------------------------------------------------------------------------------------------------------------------------------------------------------------------------------------|-------------------------------|---------------------|---------------------------------------------------|
| Liccini | 2016 | USA | outpatient | FRAIL | 198 | 64.9<br>(8.7) | ADLs included seven items (bathing, dressing, eating, transferring bed or chair, walking across a room, getting outside, and using toilet) (21). IADLs included eight items (preparing meals, shopping for groceries, managing money, making phone calls, doing light housework, doing heavy housework, getting to places outside walking distance, and managing medications) | age, sex, education and HbA1c | logistic regression | new disability (OR for frailty 3.57 (1.27-10.04)) |
|---------|------|-----|------------|-------|-----|---------------|-------------------------------------------------------------------------------------------------------------------------------------------------------------------------------------------------------------------------------------------------------------------------------------------------------------------------------------------------------------------------------|-------------------------------|---------------------|---------------------------------------------------|

|       |      |           |           |       |     |            |                                                                                                                                                                                                                                           |                                                                                                                                                                                                                                                     |                     |                                                                             |
|-------|------|-----------|-----------|-------|-----|------------|-------------------------------------------------------------------------------------------------------------------------------------------------------------------------------------------------------------------------------------------|-----------------------------------------------------------------------------------------------------------------------------------------------------------------------------------------------------------------------------------------------------|---------------------|-----------------------------------------------------------------------------|
| Thein | 2018 | Singapore | community | Fried | 486 | 67.3 (7.5) | Dependency on daily living activities was measured using self reported difficulty or needing assistance in instrumental activities of daily living (IADL) and activities of daily living (ADL), as previously validated in a local cohort | Adjusted for age, gender, education level, smoking, alcohol intake, and physical exercise, diabetes duration, WC, total cholesterol, HDL cholesterol, hypertension, cardiac disease, stroke, arthritis, hip fracture, polypharmacy, and depression. | logistic regression | cross sectional associations with ADL/IADL disability (OR 20.2 (7.74–52.6)) |
|-------|------|-----------|-----------|-------|-----|------------|-------------------------------------------------------------------------------------------------------------------------------------------------------------------------------------------------------------------------------------------|-----------------------------------------------------------------------------------------------------------------------------------------------------------------------------------------------------------------------------------------------------|---------------------|-----------------------------------------------------------------------------|



## Cognitive impairment

| Author         | Year | Country | Setting   | Frailty measure        | Number with diabetes | Mean or median age (SD or IQR) | Measure | Cross sectional/ prospective | Analysis                                            | Result               |
|----------------|------|---------|-----------|------------------------|----------------------|--------------------------------|---------|------------------------------|-----------------------------------------------------|----------------------|
| Bello-Chavolla | 2017 | Mexico  | community | Fried                  | 135                  | 77.7 (5.8)                     | MMSE    | cross sectional              | Chi squared                                         | positive association |
| Matsuzawa      | 2010 | Japan   | inpatient | CGA                    | 288                  | 72.8 (7.7)                     | MMSE    | cross sectional              | Chi squared                                         | positive association |
| Cacciatore     | 2013 | Italy   | community | Frailty staging system | 188                  | 72.8 (5.8)                     | MMSE    | cross sectional              | multivariable logistic regression model for frailty | positive association |

## Quality of Life

| Author      | Year | Country | Setting    | Frailty measure | Number with diabetes | Mean or median age (SD or IQR) | Cross sectional/ prospective | Analysis                                                                                 | Result               |
|-------------|------|---------|------------|-----------------|----------------------|--------------------------------|------------------------------|------------------------------------------------------------------------------------------|----------------------|
| Adame Perez | 2019 | Canada  | outpatient | Edmonton        | 41                   | 70 (65-74)                     | cross sectional              | Participants with frailty scored a median (range) of 31 (13 to 54) points lower in HRQoL | positive association |

|           |      |         |           |       |     |            |                 |                                                                                                                                                                                                                                   |                      |
|-----------|------|---------|-----------|-------|-----|------------|-----------------|-----------------------------------------------------------------------------------------------------------------------------------------------------------------------------------------------------------------------------------|----------------------|
|           |      |         |           |       |     |            |                 | scores when compared to nonfrail participants (p<0.05)                                                                                                                                                                            |                      |
| Matsuzawa | 2010 | Japan   | inpatient | CGA   | 288 | 72.8 (7.7) | cross sectional | Chi squared test comparing frail and non frailty people and QOL scores                                                                                                                                                            | positive association |
| Nguyen    | 2019 | Vietnam | community | Fried | 24  | NA         | cross sectional | The mean EQ-5D-5L indexes of the non-frailty, pre-frailty, and frailty groups were 0.70 (SD = 0.18), 0.70 (SD = 0.19), and 0.58 (SD = 0.20), respectively. The differences were found between non-frailty and frailty groups (p < | positive association |

|  |  |  |  |  |  |  |  |  |                                                                |  |
|--|--|--|--|--|--|--|--|--|----------------------------------------------------------------|--|
|  |  |  |  |  |  |  |  |  | 0.01), as well as the pre-frailty and frailty groups (p<0.01). |  |
|--|--|--|--|--|--|--|--|--|----------------------------------------------------------------|--|

## Depression

| Author      | Year | Country   | Setting    | Frailty measure | Number with diabetes | Mean or median age (SD or IQR) | Cross sectional/ prospective | Analysis        | Result                                                                                                                    |                      |
|-------------|------|-----------|------------|-----------------|----------------------|--------------------------------|------------------------------|-----------------|---------------------------------------------------------------------------------------------------------------------------|----------------------|
| Almeida     | 2016 | Australia | community  | FRAIL           | 717                  | NA                             | Geriatric depression scale   | cross sectional | OR for current depression 8.92 (7.10, 11.20)                                                                              | positive association |
| Adame Perez | 2019 | Canada    | outpatient | Edmonton        | 41                   | 70 (65-74)                     | Major depression inventory   | cross sectional | Frail participants had a higher incidence (83% frail vs. 6% non frail) of depression (p=0.005) than those without frailty | positive association |

|           |      |       |           |     |     |            |                            |                 |                                         |                |
|-----------|------|-------|-----------|-----|-----|------------|----------------------------|-----------------|-----------------------------------------|----------------|
| Matsuzawa | 2010 | Japan | inpatient | CGA | 288 | 72.8 (7.7) | Geriatric depression scale | cross sectional | No significant difference in mean score | no association |
|-----------|------|-------|-----------|-----|-----|------------|----------------------------|-----------------|-----------------------------------------|----------------|

## Assessment of publication bias

Funnel plot of studies assessing relationship between diabetes status and incidence of frailty

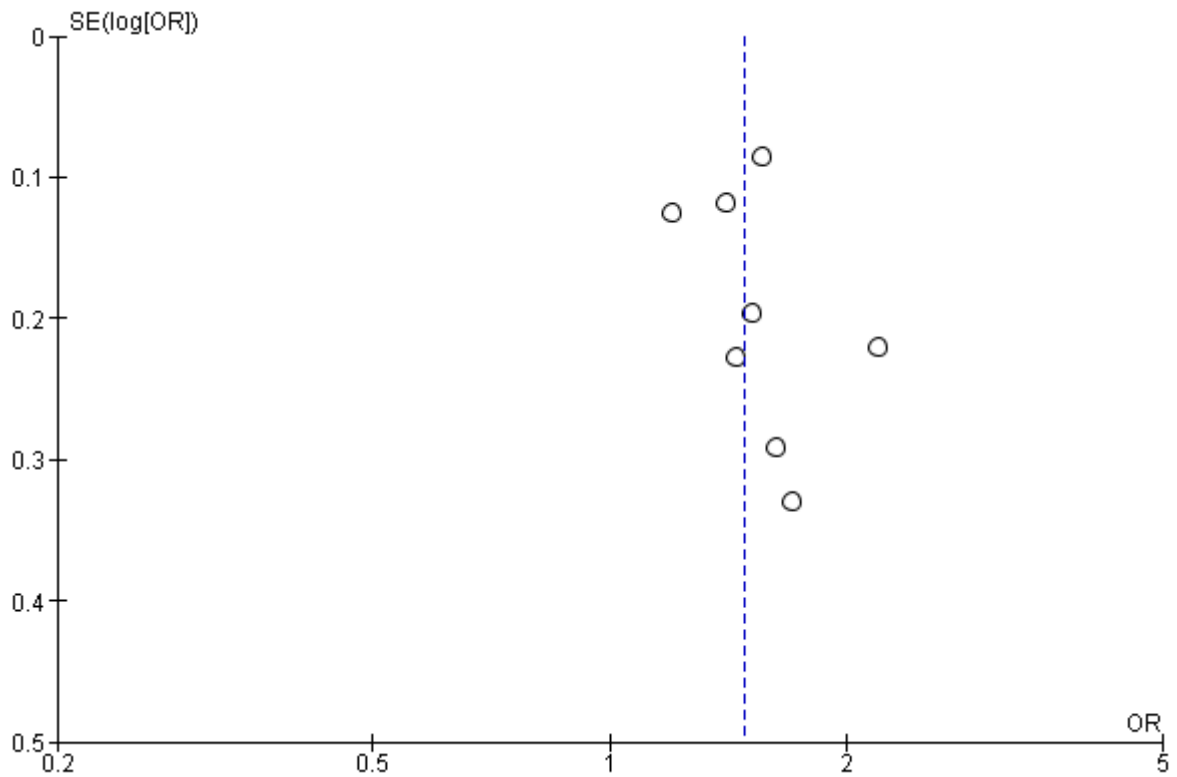

No clear evidence of publication bias. However, this should be interpreted with caution given the small number of studies included in the plot.

Funnel plot of studies assessing hazard ratio of mortality associated with frailty

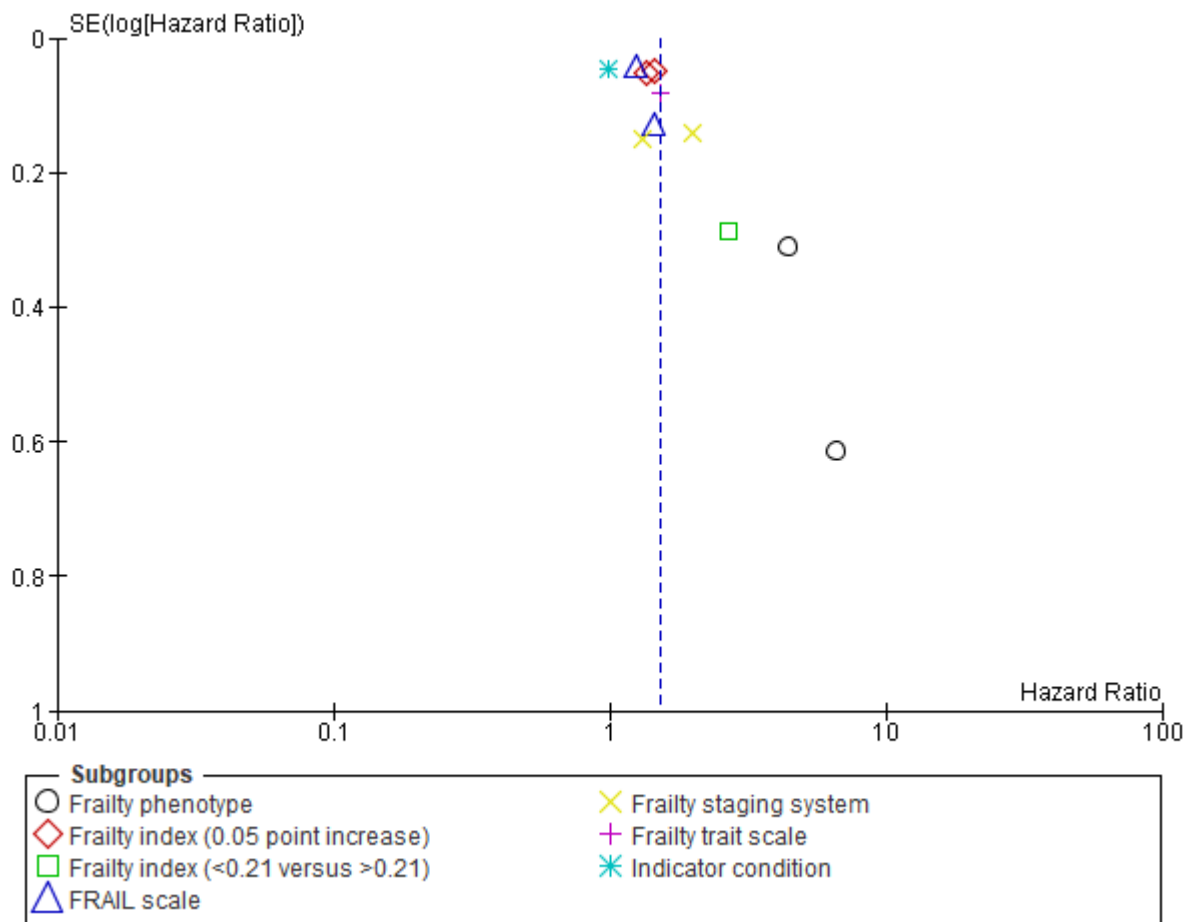

Some asymmetry in this plot which may include publication bias. However this appears to be driven by the higher effect size of the frailty phenotype studies rather than true bias towards studies with higher effect sizes.

## References of included studies

Studies included in figure 2 are indicated in bold.

- 1. Adame Perez SI, Senior PA, Field CJ, Jindal K, Mager DR. Frailty, Health-Related Quality of Life, Cognition, Depression, Vitamin D and Health-Care Utilization in an Ambulatory Adult Population With Type 1 or Type 2 Diabetes Mellitus and Chronic Kidney Disease: A Cross-Sectional Analysis. *Canadian journal of diabetes* 2019; 43(2): 90-7.**
- 2. Aguayo GA, Hulman A, Vaillant MT, et al. Prospective association among diabetes diagnosis, HbA1c, glycemia, and frailty trajectories in an elderly population. *Diabetes Care* 2019; 42(10): 1903-11.**
- 3. Aguilar-Navarro SG, Mimenza-Alvarado AJ, Corona-Sevilla I, et al. Cerebral vascular reactivity in frail older adults with vascular cognitive impairment. *Brain Sciences* 2019; 9(9): 214.**
- 4. Al Snih S, Graham JE, Ray LA, Samper-Ternent R, Markides KS, Ottenbacher KJ. Frailty and incidence of activities of daily living disability among older Mexican Americans. *Journal of Rehabilitation medicine* 2009; 41(11): 892-7.**
- 5. Almeida OP, McCaul K, Hankey GJ, et al. Duration of diabetes and its association with depression in later life: The Health In Men Study (HIMS). *Maturitas* 2016; 86: 3-9.**
- 6. Ambagtsheer RC, Beilby J, Seiboth C, Dent E. Prevalence and associations of frailty in residents of Australian aged care facilities: findings from a retrospective cohort study. *Aging Clin Exp Res* 2019.**
- 7. Anjos DMD, Moreira BD, Pereira DS, et al. Impact of Type-2 Diabetes Time Since Diagnosis on Elderly Women Gait and Functional Status. *Physiother Res Int* 2017; 22(2): 8.**
- 8. Atif M, Saleem Q, Asghar S, Malik H, Ahmad N. Extent and Predictors of Poor Glycaemic Control among Elderly Pakistani Patients with Type 2 Diabetes Mellitus: A Multi-Centre Cross-Sectional Study. *Med Lith* 2019; 55(1): 11.**
- 9. Avila-Funes JA, Helmer C, Amieva H, et al. Frailty among community-dwelling elderly people in France: the three-city study. *The Journals of Gerontology Series A: Biological Sciences and Medical Sciences* 2008; 63(10): 1089-96.**
- 10. Azmon M, Gayus N, Michal H, Olmer L, Cukierman-Yaffe T. The Association between Glucose Control and Functional Indices in Older People with Diabetes. *Int J Endocrinol* 2018; 7.**
- 11. Bello-Chavolla OY, Aguilar-Salinas CA, Avila-Funes JA. Geriatric Syndromes and Not Cardiovascular Risk Factors are Associated with Cognitive Impairment among Mexican Community-Dwelling Elderly with Type 2 Diabetes. *Revista de investigacion clinica; organo del Hospital de Enfermedades de la Nutricion* 2017; 69(3): 166-72.**
- 12. Boas N, Salome GM, Ferreira LM. Frailty syndrome and functional disability among older adults with and without diabetes and foot ulcers. *J Wound Care* 2018; 27(7): 409-16.**
- 13. Bouillon K, Kivimaki M, Hamer M, et al. Diabetes risk factors, diabetes risk algorithms, and the prediction of future frailty: the Whitehall II prospective cohort study. *Journal of the American Medical Directors Association* 2013; 14(11): 851.e1-6.**
- 14. Brunner EJ, Shipley MJ, Ahmadi-Abhari S, et al. Midlife contributors to socioeconomic differences in frailty during later life: a prospective cohort study. *The Lancet Public Health* 2018; 3(7): e313-e22.**
- 15. Cacciatore F, Testa G, Galizia G, et al. Clinical frailty and long-term mortality in elderly subjects with diabetes. *Acta diabetologica* 2013; 50(2): 251-60.**
- 16. Cakmur H. Frailty among elderly adults in a rural area of Turkey. *Medical science monitor : international medical journal of experimental and clinical research* 2015; 21: 1232-42.**

17. Calado LB, Ferriolli E, Moriguti JC, Martinez EZ, Lima NKD. Frailty syndrome in an independent urban population in Brazil (FIBRA study): a cross-sectional populational study. *Sao Paulo Med J* 2016; 134(5): 385-92.
18. Carneiro JA, Ramos GCF, Barbosa ATF, de Mendonca JMG, da Costa FM, Caldeira AP. Prevalence and factors associated with frailty in non-institutionalized older adults. *Rev Bras Enferm* 2016; 69(3): 408-15.
19. Castrejon-Perez RC, Aguilar-Salinas CA, Gutierrez-Robledo LM, Cesari M, Perez-Zepeda MU. Frailty, diabetes, and the convergence of chronic disease in an age-related condition: a population-based nationwide cross-sectional analysis of the Mexican nutrition and health survey. *Aging Clin Exp Res* 2018; 30(8): 935-41.
20. Castrejón-Pérez RC, Borges-Yáñez SA, Gutiérrez-Robledo LM, Ávila-Funes JA. Oral health conditions and frailty in Mexican community-dwelling elderly: a cross sectional analysis. *BMC public health* 2012; 12(1): 773.
21. Castrejon-Perez RC, Gutierrez-Robledo LM, Cesari M, Perez-Zepeda MU. Diabetes mellitus, hypertension and frailty: A population-based, cross-sectional study of Mexican older adults. *Geriatr Gerontol Int* 2017; 17(6): 925-30.
22. Castro-Rodriguez M, Carnicero JA, Garcia-Garcia FJ, et al. Frailty as a Major Factor in the Increased Risk of Death and Disability in Older People With Diabetes. *Journal of the American Medical Directors Association* 2016; 17(10): 949-55.
23. Cesari M, Leeuwenburgh C, Lauretani F, et al. Frailty syndrome and skeletal muscle: results from the Invecchiare in Chianti study. *The American journal of clinical nutrition* 2006; 83(5): 1142-8.
24. Chang SS, Weiss CO, Xue Q-L, Fried LP. Patterns of comorbid inflammatory diseases in frail older women: the Women's Health and Aging Studies I and II. *Journals of Gerontology Series A: Biomedical Sciences and Medical Sciences* 2010; 65(4): 407-13.
25. Chang Y-W, Chen W-L, Lin F-G, et al. Frailty and its impact on health-related quality of life: a cross-sectional study on elder community-dwelling preventive health service users. *PloS one* 2012; 7(5).
26. Chao CT, Wang J, Chien KL, Ntuh COGN. Both pre-frailty and frailty increase healthcare utilization and adverse health outcomes in patients with type 2 diabetes mellitus. *Cardiovasc Diabetol* 2018; 17: 13.
27. Chaves PHM, Semba RD, Leng SX, et al. Impact of anemia and cardiovascular disease on frailty status of community-dwelling older women: the Women's Health and Aging Studies I and II. *The Journals of Gerontology Series A: Biological Sciences and Medical Sciences* 2005; 60(6): 729-35.
28. Chen C-Y, Wu S-C, Chen L-J, Lue B-H. The prevalence of subjective frailty and factors associated with frailty in Taiwan. *Archives of gerontology and geriatrics* 2010; 50: S43-S7.
29. Chen LJ, Chen CY, Lue BH, Tseng MY, Wu SC. Prevalence and associated factors of frailty among elderly people in Taiwan. *International Journal of Gerontology* 2014; 8(3): 114-9.
30. Cheong CY, Nyunt MSZ, Gao Q, et al. Risk Factors of Progression to Frailty: Findings from the Singapore Longitudinal Ageing Study. *Journal of Nutrition, Health and Aging* 2019.
31. Chhetri JK, Zheng Z, Xu X, Ma C, Chan P. The prevalence and incidence of frailty in Pre-diabetic and diabetic community-dwelling older population: results from Beijing longitudinal study of aging II (BLSA-II). *BMC geriatrics* 2017; 17(1): 47.
32. Chiu CJ, Cheng YY. Utility of geriatric syndrome indicators for predicting subsequent health care utilization in older adults in Taiwan. *International Journal of Environmental Research and Public Health* 2019; 16(3): 456.
33. Chode S, Malmstrom TK, Miller DK, Morley JE. Frailty, Diabetes, and Mortality in Middle-Aged African Americans. *The journal of nutrition, health & aging* 2016; 20(8): 854-9.
34. Cigolle CT, Ofstedal MB, Tian Z, Blaum CS. Comparing models of frailty: the Health and Retirement Study. *Journal of the American Geriatrics Society* 2009; 57(5): 830-9.



35. Crow RS, Lohman MC, Titus AJ, et al. Mortality Risk Along the Frailty Spectrum: Data from the National Health and Nutrition Examination Survey 1999 to 2004. *Journal of the American Geriatrics Society* 2018; 66(3): 496-502.
36. da Silva AP, da Pureza DY, Landre CB. Frailty syndrome in elderly patients with type 2 diabetes mellitus. *Acta Paul Enferm* 2015; 28(6): 503-9.
37. Danon-Hersch N, Rodondi N, Spagnoli J, Santos-Eggimann B. Prefrailty and chronic morbidity in the youngest old: an insight from the Lausanne cohort Lc65+. *Journal of the American Geriatrics Society* 2012; 60(9): 1687-94.
38. de León González ED, Hermosillo HG, Beltran JAM, et al. Validation of the FRAIL scale in Mexican elderly: results from the Mexican Health and Aging Study. *Aging Clin Exp Res* 2016; 28(5): 901-8.
39. Doi T, Makizako H, Tsutsumimoto K, et al. Transitional status and modifiable risk of frailty in Japanese older adults: A prospective cohort study. *Geriatr Gerontol Int* 2018; 18(11): 1562-6.
40. Espinoza SE, Hazuda HP. Frailty prevalence and neighborhood residence in older Mexican Americans: the San Antonio longitudinal study of aging. *Journal of the American Geriatrics Society* 2015; 63(1): 106-11.
41. Espinoza SE, Jung I, Hazuda H. Lower frailty incidence in older Mexican Americans than in older European Americans: the San Antonio Longitudinal Study of Aging. *Journal of the American Geriatrics Society* 2010; 58(11): 2142-8.
42. Espinoza SE, Jung I, Hazuda H. Frailty transitions in the San Antonio Longitudinal Study of Aging. *Journal of the American Geriatrics Society* 2012; 60(4): 652-60.
43. Ferri-Guerra J, Aparicio-Ugarriza R, Salguero D, et al. The Association of Frailty with Hospitalizations and Mortality Among Community Dwelling Older Adults with Diabetes. *J Frailty Aging*: 7.
44. Fried LP, Tangen CM, Walston J, et al. Frailty in older adults: evidence for a phenotype. *The Journals of Gerontology Series A: Biological Sciences and Medical Sciences* 2001; 56(3): M146-M57.
45. Fugate Woods N, LaCroix AZ, Gray SL, et al. Frailty: emergence and consequences in women aged 65 and older in the Women's Health Initiative Observational Study. *Journal of the American Geriatrics Society* 2005; 53(8): 1321-30.
46. Garcia-Esquinas E, Graciani A, Guallar-Castillon P, Lopez-Garcia E, Rodriguez-Manas L, Rodriguez-Artalejo F. Diabetes and risk of frailty and its potential mechanisms: a prospective cohort study of older adults. *Journal of the American Medical Directors Association* 2015; 16(9): 748-54.
47. Hanlon P, Nicholl BI, Jani BD, Lee D, McQueenie R, Mair FS. Frailty and pre-frailty in middle-aged and older adults and its association with multimorbidity and mortality: a prospective analysis of 493 737 UK Biobank participants. *The Lancet Public health* 2018; 3(7): e323-e32.
48. Hasan SS, Kow CS, Verma RK, Ahmed SI, Mittal P, Chong DWK. An evaluation of medication appropriateness and frailty among residents of aged care homes in Malaysia: A cross-sectional study. *Medicine* 2017; 96(35): e7929.
49. Hippisley-Cox J, Coupland C. Development and validation of QMortality risk prediction algorithm to estimate short term risk of death and assess frailty: cohort study. *BMJ (Clinical research ed)* 2017; 358: j4208.
50. Howrey BT, Al Snih S, Markides KS, Ottenbacher KJ. Frailty and diabetes among Mexican American older adults. *Annals of epidemiology* 2018; 28(7): 421-6.e1.
51. Hubbard RE, Andrew MK, Fallah N, Rockwood K. Comparison of the prognostic importance of diagnosed diabetes, co-morbidity and frailty in older people. *Diabetic medicine : a journal of the British Diabetic Association* 2010; 27(5): 603-6.
52. Hyde Z, Smith K, Flicker L, et al. HbA1c Is Associated with Frailty in a Group of Aboriginal Australians. *The Journal of frailty & aging* 2019; 8(1): 17-20.
53. Khan H, Kalogeropoulos AP, Georgiopoulou VV, et al. Frailty and risk for heart failure in older adults: the health, aging, and body composition study. *American heart journal* 2013; 166(5): 887-94.

54. Khandelwal D, Goel A, Kumar U, Gulati V, Narang R, Dey AB. Frailty is associated with longer hospital stay and increased mortality in hospitalized older patients. *The journal of nutrition, health & aging* 2012; 16(8): 732-5.
55. Kirkwood RN, Borem IL, Sampaio RF, et al. Frailty Status and Gait Parameters of Older Women With Type 2 Diabetes. *Canadian journal of diabetes* 2019; 43(2): 121-7.
56. Kitamura A, Taniguchi Y, Seino S, et al. Combined effect of diabetes and frailty on mortality and incident disability in older Japanese adults. *Geriatrics and Gerontology International* 2019; 19(5): 423-8.
57. Lahousse L, Maes B, Ziere G, et al. Adverse outcomes of frailty in the elderly: the Rotterdam Study. *European journal of epidemiology* 2014; 29(6): 419-27.
58. Lee JSW, Auyeung TW, Leung J, Kwok T, Leung PC, Woo J. Physical frailty in older adults is associated with metabolic and atherosclerotic risk factors and cognitive impairment independent of muscle mass. *The journal of nutrition, health & aging* 2011; 15(10): 857-62.
59. Lee JSW, Auyeung T-W, Leung J, Kwok T, Woo J. Transitions in frailty states among community-living older adults and their associated factors. *Journal of the American Medical Directors Association* 2014; 15(4): 281-6.
60. Lee S, Harada K, Bae S, et al. Relationship between chronic kidney disease with diabetes or hypertension and frailty in community-dwelling Japanese older adults. *Geriatrics and Gerontology International* 2017; 17(10): 1527-33.
61. Lekan DA, McCoy TP. Frailty risk in hospitalised older adults with and without diabetes mellitus. *Journal of clinical nursing* 2018; 27(19-20): 3510-21.
62. Li CL, Stanaway FF, Lin JD, Chang HY. Frailty and health care use among community-dwelling older adults with diabetes: A population-based study. *Clinical Interventions in Aging* 2018; 13: 2295-300.
63. Li G, Prior JC, Leslie WD, et al. Frailty and risk of fractures in patients with type 2 diabetes. *Diabetes Care* 2019; 42(4): 507-13.
64. Li J, Nie S, Wang S, et al. Operationalization of Frailty Index in Diabetic Older Patients. *Journal of the American Medical Directors Association* 2016; 17(3): 273-4.
65. Li Y, Zou Y, Wang S, et al. A Pilot Study of the FRAIL Scale on Predicting Outcomes in Chinese Elderly People With Type 2 Diabetes. *Journal of the American Medical Directors Association* 2015; 16(8): 714.e7-.e12.
66. Li YX, Jiang XY, Stone C, et al. A new physical-cognitive scale for assessment of frailty in Chinese Han elderly. *Neurological Research* 2019; 41(8): 728-33.
67. Liccini A, Malmstrom TK. Frailty and Sarcopenia as Predictors of Adverse Health Outcomes in Persons With Diabetes Mellitus. *Journal of the American Medical Directors Association* 2016; 17(9): 846-51.
68. Lin CH, Chou CY, Liu CS, Huang CY, Li TC, Lin CC. Association between frailty and subclinical peripheral vascular disease in a community-dwelling geriatric population: Taichung Community Health Study for Elders. *Geriatrics and Gerontology International* 2015; 15(3): 261-7.
69. MacKenzie HT, Tugwell B, Rockwood K, Theou O. Frailty and Diabetes in Older Hospitalized Adults: The Case for Routine Frailty Assessment. *Canadian Journal of Diabetes* 2019.
70. Matsuzawa T, Sakurai T, Kuranaga M, Endo H, Yokono K. Predictive factors for hospitalized and institutionalized care-giving of the aged patients with diabetes mellitus in Japan. *The Kobe journal of medical sciences* 2011; 56(4): E173-83.
71. McAlister FA, Lethebe BC, Lambe C, Williamson T, Lowerison M. Control of glycemia and blood pressure in British adults with diabetes mellitus and subsequent therapy choices: a comparison across health states. *Cardiovasc Diabetol* 2018; 17(1): 27.
72. McAlister FA, Youngson E, Eurich DT. Treated glycosylated hemoglobin levels in individuals with diabetes mellitus vary little by health status: A retrospective cohort study. *Medicine* 2016; 95(24): e3894.

73. McAlister FA, Youngson E, Eurich DT. Treatment Deintensification Is Uncommon in Adults With Type 2 Diabetes Mellitus: A Retrospective Cohort Study. *Circulation Cardiovascular quality and outcomes* 2017; 10(4).
74. McClure R, Villain A. Greater adherence to a Mediterranean Diet is associated with better gait speed in older adults with type 2 diabetes mellitus. *Clin Nutr ESPEN* 2019; 32: 33-9.
75. Merchant RA, Chen MZ, Tan LWL, Lim MY, Ho HK, van Dam RM. Singapore Healthy Older People Everyday (HOPE) Study: Prevalence of Frailty and Associated Factors in Older Adults. *Journal of the American Medical Directors Association* 2017; 18(8): 734.
76. Mohr BA, Bhasin S, Kupelian V, Araujo AB, O'Donnell AB, McKinlay JB. Testosterone, sex hormone-binding globulin, and frailty in older men. *Journal of the American Geriatrics Society* 2007; 55(4): 548-55.
77. Molist-Brunet N, Sevilla-Sanchez D, Puigoriol-Juventeny E, et al. Optimizing drug therapy in frail patients with type 2 diabetes mellitus. *Aging Clin Exp Res* 2019.
78. Moreira Bd.e S, Dos Anjos DM, Pereira DS, et al. The geriatric depression scale and the timed up and go test predict fear of falling in community-dwelling elderly women with type 2 diabetes mellitus: a cross-sectional study. *BMC geriatrics* 2016; 16: 56.
79. Moreira BdS, Sampaio RF, Diz JBM, et al. Factors associated with fear of falling in community-dwelling older adults with and without diabetes mellitus: Findings from the Frailty in Brazilian Older People Study (FIBRA-BR). *Experimental gerontology* 2017; 89: 103-11.
80. Motokawa K, Watanabe Y, Edahiro A, et al. Frailty Severity and Dietary Variety in Japanese Older Persons: A Cross-Sectional Study. *The journal of nutrition, health & aging* 2018; 22(3): 451-6.
81. Nadruz W, Jr., Kitzman D, Windham BG, et al. Cardiovascular Dysfunction and Frailty Among Older Adults in the Community: The ARIC Study. *The journals of gerontology Series A, Biological sciences and medical sciences* 2017; 72(7): 958-64.
82. Nelson JM, Dufraux K, Cook PF. The relationship between glycemic control and falls in older adults. *Journal of the American Geriatrics Society* 2007; 55(12): 2041-4.
83. Ng TP, Feng L, Nyunt MSZ, Larbi A, Yap KB. Frailty in older persons: multisystem risk factors and the Frailty Risk Index (FRI). *Journal of the American Medical Directors Association* 2014; 15(9): 635-42.
84. Nguyen AT, Nguyen LH, Nguyen TX, et al. Frailty prevalence and association with health-related quality of life impairment among rural community-dwelling older adults in Vietnam. *International Journal of Environmental Research and Public Health* 2019; 16(20): 3869.
85. Nguyen TTH, Vu HTT, Nguyen TN, et al. Assessment of nutritional status in older diabetic outpatients and related factors in Hanoi, Vietnam. *Journal of Multidisciplinary Healthcare* 2019; 12: 601-6.
86. Nishimura A, Harashima S, Hosoda K, Arai H, Inagaki N. Sex-related differences in frailty factors in older persons with type 2 diabetes: a cross-sectional study. *Ther Adv Endocrinol Metab* 2019; 10: 14.
87. Orkaby AR, Lunetta KL, Sun FJ, et al. Cross-Sectional Association of Frailty and Arterial Stiffness in Community-Dwelling Older Adults: The Framingham Heart Study. *The journals of gerontology Series A, Biological sciences and medical sciences* 2019; 74(3): 373-9.
88. Ottenbacher KJ, Graham JE, Al Snih S, et al. Mexican Americans and frailty: findings from the Hispanic established populations epidemiologic studies of the elderly. *American journal of public health* 2009; 99(4): 673-9.
89. Pilotto A, Noale M, Maggi S, et al. Hypoglycemia Is Independently Associated with Multidimensional Impairment in Elderly Diabetic Patients. *Biomed Res Int* 2014: 7.
90. Pollack LR, Litwack-Harrison S, Cawthon PM, et al. Patterns and Predictors of Frailty Transitions in Older Men: The Osteoporotic Fractures in Men Study. *Journal of the American Geriatrics Society* 2017; 65(11): 2473-9.

91. Presley CA, Chipman J, Min JY, et al. Evaluation of Frailty as an Unmeasured Confounder in Observational Studies of Antidiabetic Medications. *J Gerontol Ser A-Biol Sci Med Sci* 2019; **74**(8): 1282-8.
92. Raji MA, Al Snih S, Ostir GV, Markides KS, Ottenbacher KJ. Cognitive status and future risk of frailty in older Mexican Americans. *Journals of Gerontology Series A: Biomedical Sciences and Medical Sciences* 2010; **65**(11): 1228-34.
93. Ricci NA, Pessoa GS, Ferriolli E, Dias RC, Perracini MR. Frailty and cardiovascular risk in community-dwelling elderly: a population-based study. *Clinical interventions in aging* 2014; **9**: 1677-85.
94. Saum KU, Müller H, Stegmaier C, Hauer K, Raum E, Brenner H. Development and Evaluation of a Modification of the Fried Frailty Criteria Using Population-Independent Cutpoints. *Journal of the American Geriatrics Society* 2012; **60**(11): 2110-5.
95. Simpson SH, Lin M, Eurich DT. Medication Adherence Affects Risk of New Diabetes Complications: A Cohort Study. *The Annals of pharmacotherapy* 2016; **50**(9): 741-6.
96. Sirola J, Pitkala KH, Tilvis RS, Miettinen TA, Strandberg TE. Definition of frailty in older men according to questionnaire data (RAND-36/SF-36): The Helsinki Businessmen Study. *The journal of nutrition, health & aging* 2011; **15**(9): 783-7.
97. Tamura Y, Ishikawa J, Fujiwara Y, et al. Prevalence of frailty, cognitive impairment, and sarcopenia in outpatients with cardiometabolic disease in a frailty clinic. *BMC geriatrics* 2018; **18**(1): 264.
98. Tang Z, Wang C, Song X, et al. Co-occurrence of cardiometabolic diseases and frailty in older Chinese adults in the Beijing Longitudinal Study of Ageing. *Age and ageing* 2013; **42**(3): 346-51.
99. Tepper S, Alter Sivashensky A, Rivkah Shahar D, Geva D, Cukierman-Yaffe T. The Association between Mediterranean Diet and the Risk of Falls and Physical Function Indices in Older Type 2 Diabetic People Varies by Age. *Nutrients* 2018; **10**(6).
100. Thein FS, Li Y, Nyunt MSZ, Gao Q, Wee SL, Ng TP. Physical frailty and cognitive impairment is associated with diabetes and adversely impact functional status and mortality. *Postgraduate medicine* 2018; **130**(6): 561-7.
101. Tuttle LJ, Bittel DC, Bittel AJ, Sinacore DR. Early-Onset Physical Frailty in Adults With Diabetes and Peripheral Neuropathy. *Canadian journal of diabetes* 2018; **42**(5): 478-83.
102. Vaingankar JA, Chong SA, Abidin E, et al. Prevalence of frailty and its association with sociodemographic and clinical characteristics, and resource utilization in a population of Singaporean older adults. *Geriatr Gerontol Int* 2017; **17**(10): 1444-54.
103. van Hateren KJJ, Hendriks SH, Groenier KH, et al. Frailty and the relationship between blood pressure and mortality in elderly patients with type 2 diabetes (Zwolle Outpatient Diabetes project Integrating Available Care-34). *Journal of hypertension* 2015; **33**(6): 1162-6.
104. Vaz Fragoso CA, Gahbauer EA, Van Ness PH, Gill TM. Sleep-wake disturbances and frailty in community-living older persons. *Journal of the American Geriatrics Society* 2009; **57**(11): 2094-100.
105. Veronese N, Sigeirsdottir K, Eiriksdottir G, et al. Frailty and Risk of Cardiovascular Diseases in Older Persons: The Age, Gene/Environment Susceptibility-Reykjavik Study. *Rejuvenation research* 2017; **20**(6): 517-24.
106. Veronese N, Stubbs B, Fontana L, et al. Frailty Is Associated with an Increased Risk of Incident Type 2 Diabetes in the Elderly. *Journal of the American Medical Directors Association* 2016; **17**(10): 902-7.
107. Wang C-P, Lorenzo C, Espinoza SE. Frailty attenuates the impact of metformin on reducing mortality in older adults with type 2 diabetes. *Journal of endocrinology, diabetes & obesity* 2014; **2**(2).

108. Wang C-P, Lorenzo C, Habib SL, Jo B, Espinoza SE. Differential effects of metformin on age related comorbidities in older men with type 2 diabetes. *Journal of diabetes and its complications* 2017; 31(4): 679-86.
109. Watanabe Y, Hirano H, Arai H, et al. Relationship Between Frailty and Oral Function in Community-Dwelling Elderly Adults. *Journal of the American Geriatrics Society* 2017; 65(1): 66-76.
110. Weinstein G, Lutski M, Goldbourt U, Tanne D. Physical frailty and cognitive function among men with cardiovascular disease. *Archives of gerontology and geriatrics* 2018; 78: 1-6.
111. Wong CH, Weiss D, Sourial N, et al. Frailty and its association with disability and comorbidity in a community-dwelling sample of seniors in Montreal: a cross-sectional study. *Aging Clin Exp Res* 2010; 22(1): 54-62.
112. Wong TY, Sofia Massa M, O'Halloran AM, Kenny RA, Clarke R. Cardiovascular risk factors and frailty in a cross-sectional study of older people: Implications for prevention. *Age and Ageing* 2018; 47(5): 714-20.
113. Woo J, Yang X, Lui LT, et al. Utility of the FRAIL Questionnaire in Detecting Heart Failure with Preserved Ejection Fraction. *Journal of Nutrition, Health and Aging* 2019; 23(4): 373-7.
114. Wu C, Smit E, Xue Q-L, Odden MC. Prevalence and correlates of frailty among community-dwelling Chinese older adults: the China Health and Retirement Longitudinal Study. *The Journals of Gerontology: Series A* 2018; 73(1): 102-8.
115. Wu IC, Shieh S-C, Kuo P-H, Lin X-Z. High oxidative stress is correlated with frailty in elderly chinese. *Journal of the American Geriatrics Society* 2009; 57(9): 1666-71.
116. Xue Q, Qin MZ, Jia J, Liu JP, Wang Y. Association between frailty and the cardio-ankle vascular index. *Clinical Interventions in Aging* 2019; 14: 735-42.
117. Yanagita I, Fujihara Y, Eda T, et al. Low glycated hemoglobin level is associated with severity of frailty in Japanese elderly diabetes patients. *Journal of diabetes investigation* 2018; 9(2): 419-25.
118. Zaslavsky O, Walker RL, Crane PK, Gray SL, Larson EB. Glucose Levels and Risk of Frailty. *The journals of gerontology Series A, Biological sciences and medical sciences* 2016; 71(9): 1223-9.
